# Supplementary material for: Identification of genetic variations associated with epsilon-poly-lysine biosynthesis in Streptomyces albulus ZPM by genome sequencing
Source: PubMed Central journal article supplement (PMC4361855; doi:10.1038/srep09201), 2015-03-17
Supplement: srep09201-s1.pdf [file srep09201-s1.pdf]

## Supplementary information

### **Identification of genetic variations associated with epsilon-poly-lysine biosynthesis in *Streptomyces albulus* ZPM by genome sequencing**

Lin Wang<sup>1,#</sup>, Chunhui Gao<sup>1, #</sup>, Nan Tang<sup>1</sup>, Songnian Hu<sup>3</sup>, Qingfa Wu<sup>1,2,\*</sup>

1. School of Life Sciences and Medical Center, University of Science & Technology of China, Hefei, Anhui 230027, China
2. CAS Key Laboratory of Innate Immunity and Chronic Disease, School of Life Sciences and Medical Center, University of Science & Technology of China, Hefei, Anhui 230027, China
3. CAS Key Laboratory of Genome Sciences & Information, Beijing institute of Genomics, CAS, 100101

#. These authors contributed equally to this work.

\* Corresponding authors. wuqf@ustc.edu.cn

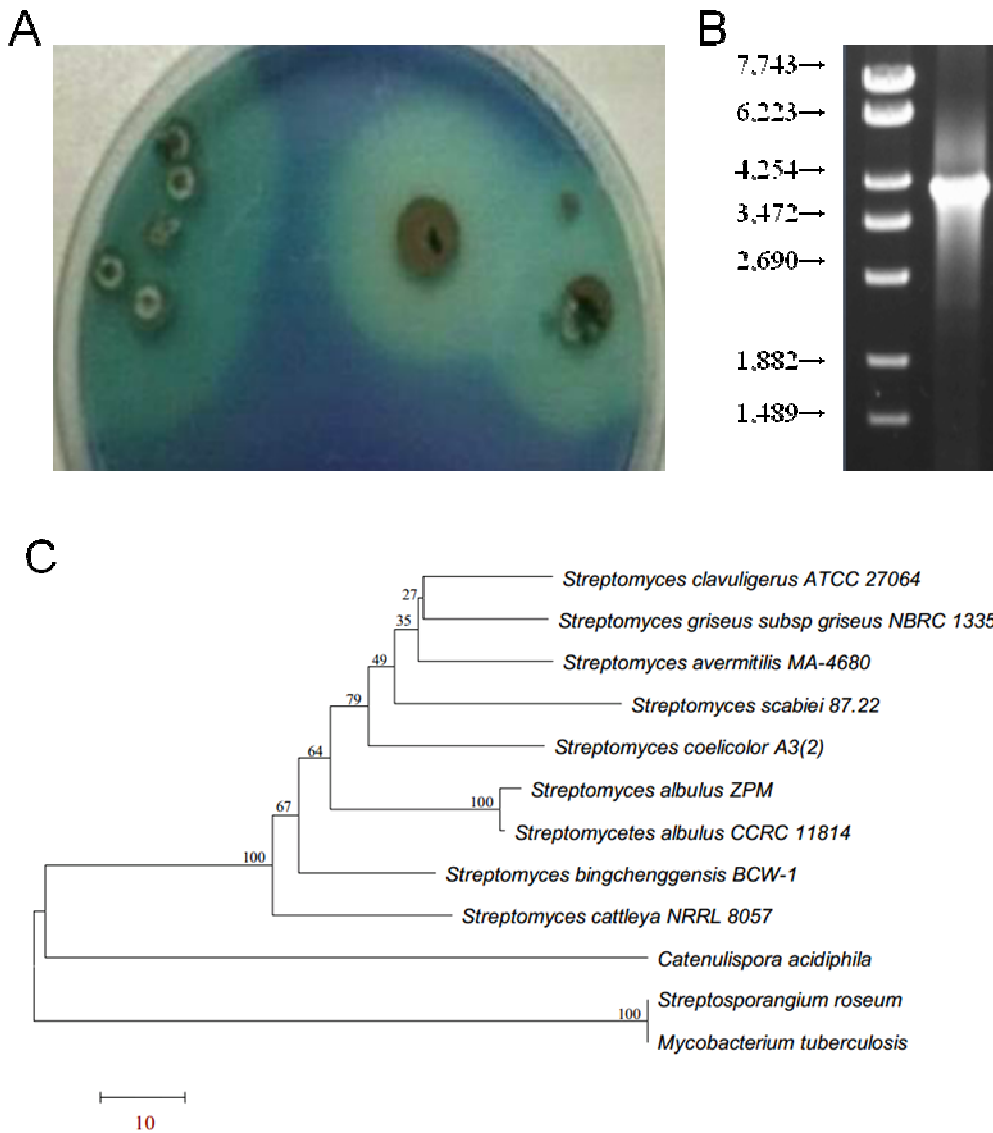

**Figure S1.  $\epsilon$ -PL-producing strain isolation based on the methylene blue method, molecular identification of the  $\epsilon$ -PL synthesis enzyme gene and phylogenetic analysis of the 16S rRNAs of *Streptomyces* species.**

(A) Isolation of the  $\epsilon$ -PL strain on agar plates embedded with the charged dye methylene blue. (B) PCR of the  $\epsilon$ -PL synthesis using specific primer pairs. (C) Phylogenetic analysis of the 16S rRNAs of *Streptomyces* species. The name *S. albulus* ZPM was given because the bacteria has the closest relationship with *S. albulus* CCRC 11814. The bootstrap values are shown on the branch.

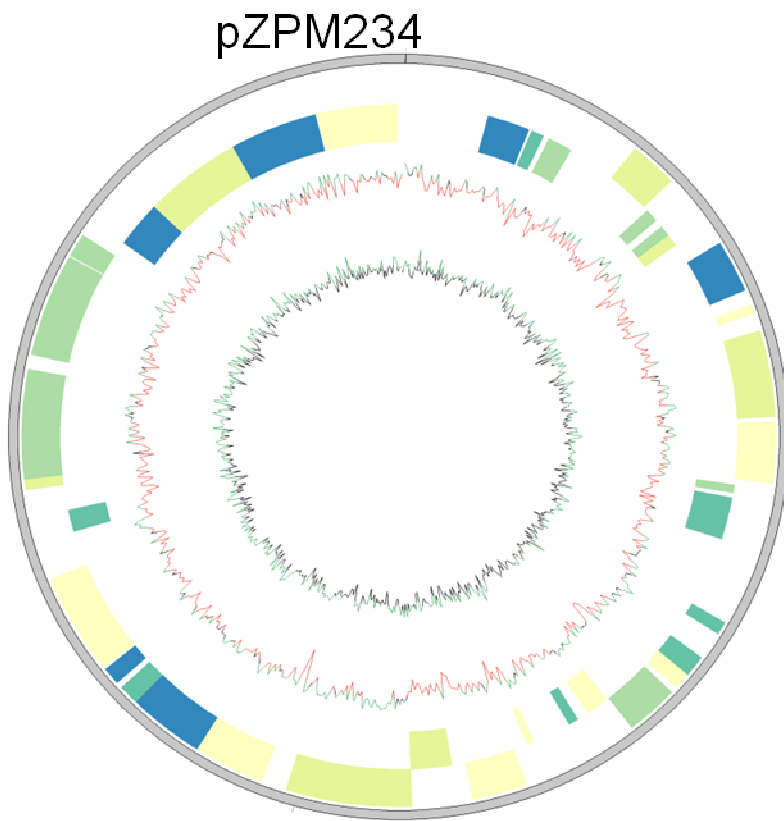

**Figure S2. Circular representation of pZPM234.** Circles 1 and 2, predicted protein-coding sequences (forward and reverse strands); Circle 3, GC content; Circle 4, GC bias.

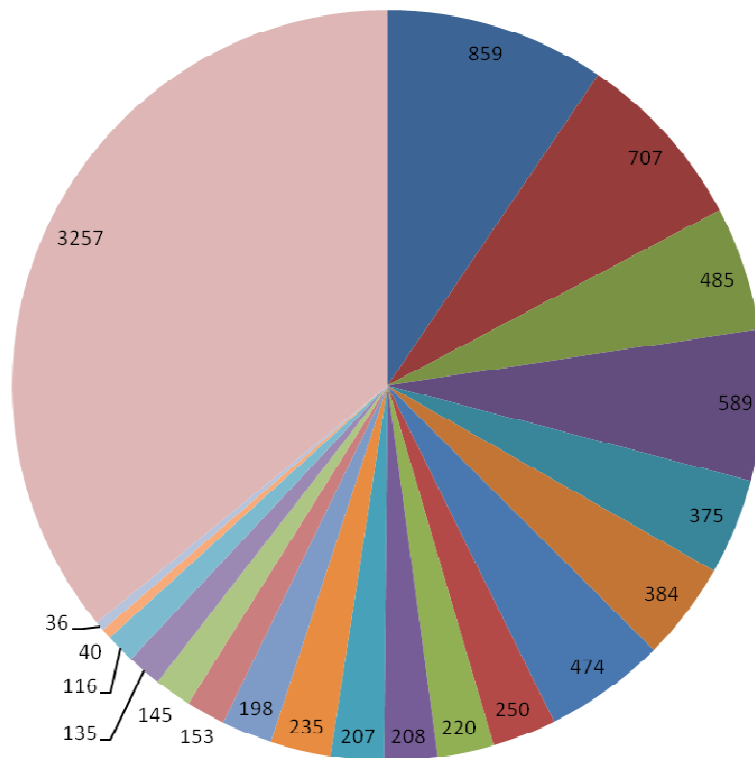

- Transcription:
- Amino acid transport and metabolism:
- Energy production and conversion:
- Secondary metabolites biosynthesis, transport and catabolism:
- Lipid transport and metabolism:
- Translation, ribosomal structure and biogenesis:
- Inorganic ion transport and metabolism:
- Posttranslational modification, protein turnover, chaperones:
- Nucleotide transport and metabolism:
- General function:
- General function prediction:
- Carbohydrate transport and metabolism:
- Replication, recombination and repair:
- Signal transduction mechanisms:
- Cell wall/membrane/envelope biogenesis:
- Coenzyme transport and metabolism:
- Defense mechanisms:
- Cell cycle control, cell division, chromosome partitioning:

**Figure S3. COG classification of 9073 genes identified in *S. albulus* ZPM.** In total, 5816 of 9073 protein-coding genes (64.1%) have been classified into at least one COG group with known or putative function.

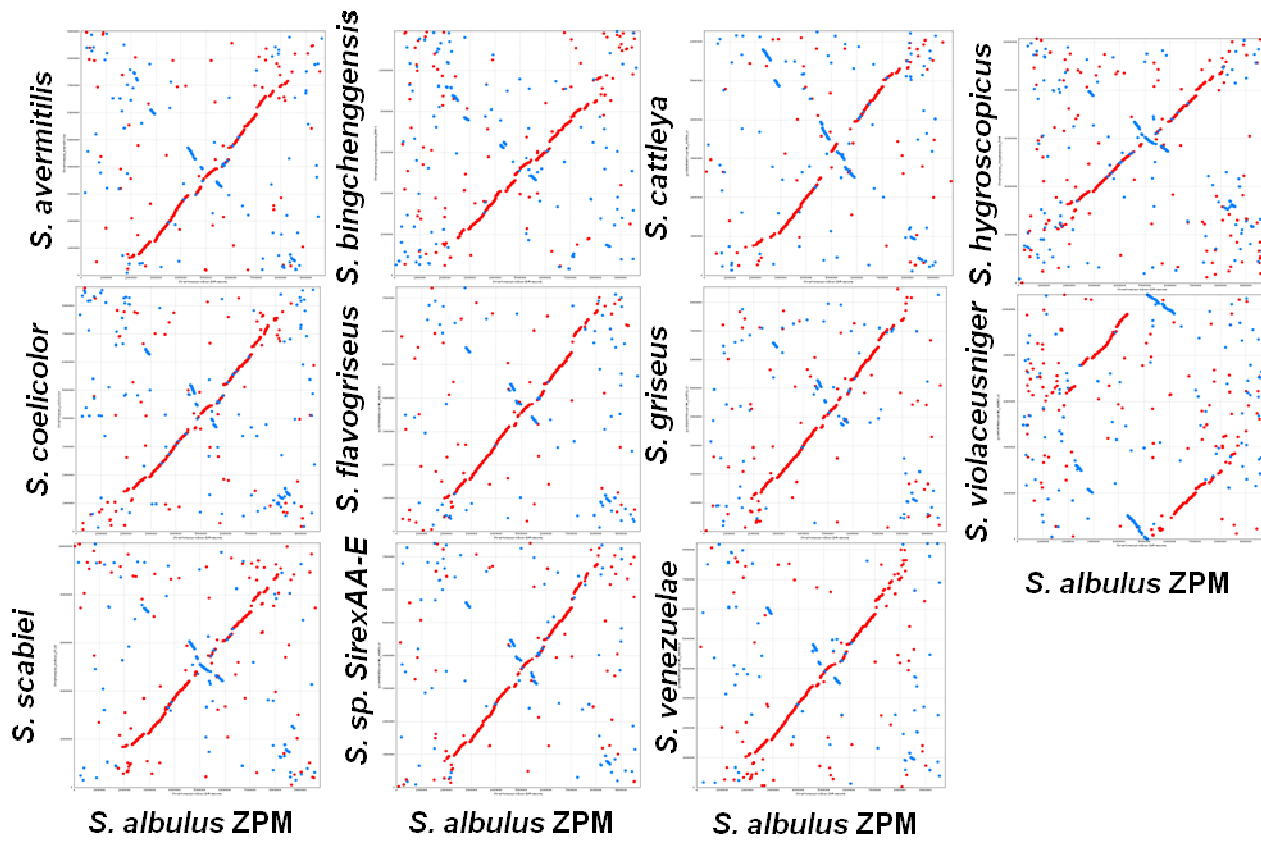

**Figure S4. Dot plots of whole-genome comparisons of *S. albus* ZPM with other *Streptomyces* species.** The whole-genome comparisons between *S. albus* ZPM and *S. coelicolor*, *S. griseus*, *S. avermitilis*, *S. bingchenggensis*, *S. flavogriseus*, *S. sp. SirexAA-E*, *S. violaceusniger*, *S. cattleya*, *S. hygroscopicus*, *S. scabiei*, *S. clavuligerus* and *S. venezuelae* were performed and visualized using the Mummer program.

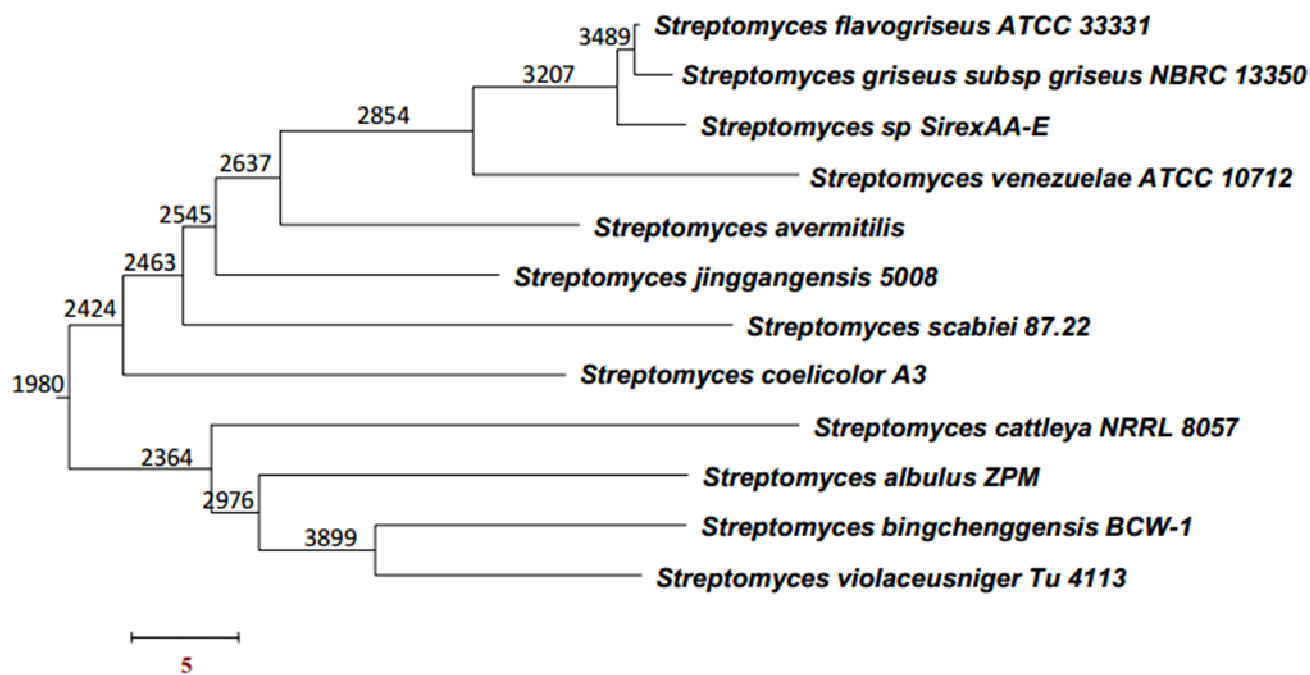

**Figure S5. Lineage-specific gene analysis using a phylogenetic tree.** The phylogenetic tree was constructed using the neighbor-joining method and was based on 16S rRNA sequences. The number of lineage-specific genes of each node is indicated on the evolutionary branches.

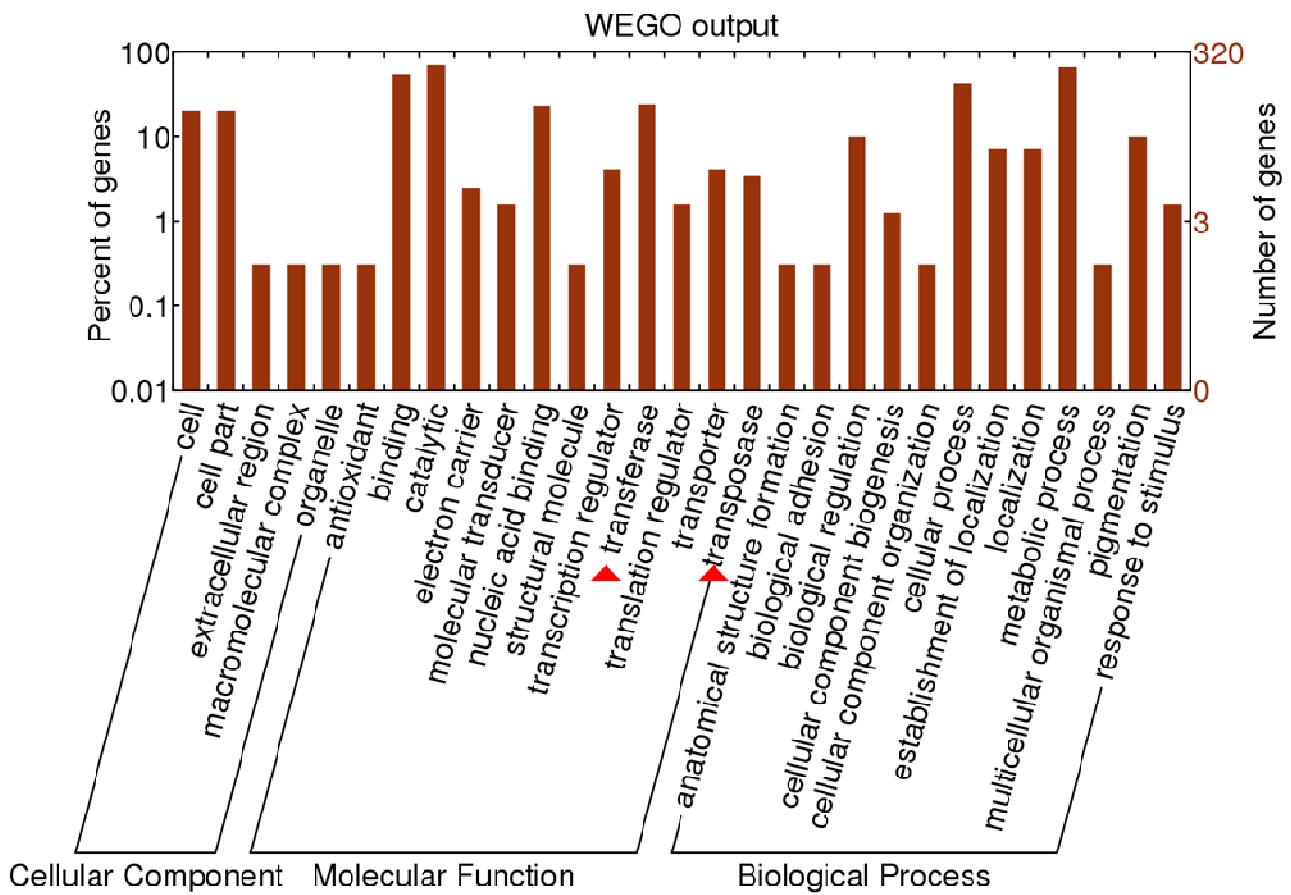

**Figure S6. GO enrichment analysis of the specific genes in *S. albulus* ZPM.** The classes of phosphopantetheinyl transferase (GO: 0016740) and DNA transposase (GO: 0004803) in the Molecular Function domain are enriched for the specific genes of *S. albulus* ZPM.

**Table S1 General features of the chromosome of *S. albulus* ZPM**

| Component of the chromosome          | Property        |
|--------------------------------------|-----------------|
| Total size                           | 9,784,577 bp    |
| Terminal inverted repeat             | 139,385 bp      |
| G+C content                          | 72.2%           |
| RNA                                  | 76              |
| rRNA (16S-23S-5S)                    | 6               |
| tRNA                                 | 70 (48 species) |
| ORFs                                 | 9073            |
| Classified in at least one COG group | 5816 (64.1%)    |
| Having specific CDD hit(s)           | 6811 (75.0%)    |
| Coding density                       | 87.5%           |
| Average CDS length                   | 944             |



**Table S2 Pan-genome analysis between *S. albus* ZPM and other *Streptomyces* species**

| Organism                            | CDS   | Core CDS | Var CDS | Strain-specific CDS | Core CDS (%) | Var CDS (%) | Strain-specific CDS (%) |
|-------------------------------------|-------|----------|---------|---------------------|--------------|-------------|-------------------------|
| <i>S. albus</i> ZPM                 | 9073  | 3985     | 2916    | 2172                | 43.92        | 32.14       | 23.94                   |
| * <i>S. avermitilis</i> MA 4680     | 7582  | 3756     | 2826    | 1000                | 49.54        | 37.27       | 13.19                   |
| * <i>S. cattleya</i> NRRL 8057      | 5822  | 3105     | 1467    | 1250                | 53.33        | 25.20       | 21.47                   |
| * <i>S. coelicolor</i> A3 (2)       | 7825  | 3878     | 3077    | 870                 | 49.56        | 39.32       | 11.12                   |
| * <i>S. venezuelae</i> ATCC 10712   | 7453  | 3588     | 2718    | 1147                | 48.14        | 36.47       | 15.39                   |
| * <i>S. scabiei</i> 88.02           | 8746  | 3889     | 3386    | 1471                | 44.47        | 38.71       | 16.82                   |
| * <i>S. violaceusniger</i> Tu 4113  | 8482  | 4176     | 3357    | 949                 | 49.23        | 39.58       | 11.19                   |
| * <i>S. bingchengensis</i> BCW-1    | 10023 | 4555     | 3628    | 1840                | 45.45        | 36.20       | 18.36                   |
| * <i>S. sp</i> SirexAA-E            | 6357  | 3535     | 2405    | 417                 | 55.61        | 37.83       | 06.56                   |
| * <i>S. flavogriseus</i> ATCC 33331 | 6298  | 3480     | 2438    | 380                 | 55.26        | 38.71       | 06.03                   |
| * <i>S. hygrosopicus</i> 5008       | 8849  | 4014     | 3306    | 1529                | 45.36        | 37.36       | 17.28                   |
| * <i>S. griseus</i>                 | 7138  | 3626     | 2696    | 816                 | 50.80        | 37.77       | 11.43                   |

\*Data were obtained from GenBank: *S. avermitilis* MA-4680 (NC\_003155); *S. cattleya* NRRL 8057 (NC\_017586); *S. coelicolor* A3 (2) (NC\_003888); *S. venezuelae* ATCC 10712 (NC\_018750); *S. scabiei* 88.22 (NC\_013929); *S. violaceusniger* Tu 4113 (NC\_015957); *S. bingchengensis* BCW-1 (NC\_016582); *S. sp* SirexAA-E (NC\_015953); *S. flavogriseus* ATCC 33331 (NC\_016114); *S. hygrosopicus* 5008 (NC\_017765); and *S. griseus* 13350 (NC\_010572).

**Table S3. The yield of each strain in group-L and group-H**

| Group-L |             | Group-H |             |
|---------|-------------|---------|-------------|
| No.     | Yield (g/L) | No.     | Yield (g/L) |
| 1       | 0.2353      | 1       | 1.05916     |
| 2       | 0.2331      | 2       | 1.02336     |
| 3       | 0.2197      | 3       | 1.0167      |
| 4       | 0.213       | 4       | 1.007       |
| 5       | 0.2108      | 5       | 0.9786      |
| 6       | 0.1548      | 6       | 0.909       |
| 7       | 0.1257      | 7       | 0.8913      |
| 8       | 0.1212      | 8       | 0.8845      |
| 9       | 0.1167      | 9       | 0.8689      |
| 10      | 0.0943      | 10      | 0.8644      |
| 11      | 0.0781      | 11      | 0.8406      |
| 12      | 0.0541      | 12      | 0.8384      |
| 13      | 0.0451      | 13      | 0.8362      |
| 14      | 0.0339      | 14      | 0.8339      |
| 15      | 0.022       | 15      | 0.8317      |
| 16      | 0.0205      | 16      | 0.8205      |
| 17      | 0.016       | 17      | 0.8183      |
| 18      | 0.0131      | 18      | 0.8116      |
| 19      | 0.0086      | 19      | 0.8115      |
| 20      | 0.0071      | 20      | 0.8106      |
| 21      | 0.0019      | 21      | 0.8071      |
| 22      | 0           | 22      | 0.807       |
| 23      | 0           | 23      | 0.8062      |
| 24      | 0           | 24      | 0.8049      |
| 25      | 0           | 25      | 0.8039      |
| 26      | 0           | 26      | 0.8026      |
| 27      | 0           | 27      | 0.8026      |
| 28      | 0           | 28      | 0.8017      |
| 29      | 0           | 29      | 0.8004      |
| 30      | 0           | 30      | 0.7985      |

**Table S4. All genetic variations identified in both group-H and group-L**

| No. | Chromosomal position (nt) | Ref. | Genetic variations | Frequencies of genetic variations |         | genetic variations of coding regions |      |                   | genetic variations of non-coding regions |                    |
|-----|---------------------------|------|--------------------|-----------------------------------|---------|--------------------------------------|------|-------------------|------------------------------------------|--------------------|
|     |                           |      |                    | group-L                           | group-H | Affected genes                       | Type | Amino acid change | Nearest genes                            | Positions to genes |
| 1   | 218244                    | T    | C                  | 100%                              | 100%    | SAZ_0187                             | Ns   | E62G              |                                          |                    |
| 2   | 237916                    | T    | G                  | 3.27%                             | -       |                                      |      |                   | SAZ_0210,SAZ_0209                        | Up, Dn             |
| 3   | 270391                    | A    | C                  | -                                 | 3.50%   | SAZ_0249                             | Ns   | Y72S              |                                          |                    |
| 4   | 279849                    | -    | C                  | 13.92%                            | 17.12%  |                                      |      |                   | SAZ_0258                                 | Dn                 |
| 5   | 343098                    | A    | C                  | 3.04%                             | -       | SAZ_0323                             | Ns   | H259P             |                                          |                    |
| 6   | 400188                    | A    | C                  | 3.27%                             | -       | SAZ_0379                             | Ns   | H289P             |                                          |                    |
| 7   | 440541                    | A    | C                  | 3.16%                             | -       |                                      |      |                   | SAZ_0427,SAZ_0428                        | Up                 |
| 8   | 455109                    | T    | G                  | -                                 | 4.27%   |                                      |      |                   | SAZ_0440                                 | Dn                 |
| 9   | 505143                    | T    | G                  | 3.86%                             | -       | SAZ_0496                             | Ns   | T258P             |                                          |                    |
| 10  | 584310                    | T    | G                  | 3.29%                             | -       | SAZ_0569                             | Ns   | H275P             |                                          |                    |
| 11  | 635013                    | T    | G                  | 3.23%                             | -       | SAZ_0612                             | Ns   | H214P             |                                          |                    |
| 12  | 643291                    | G    | C                  | 6.09%                             | -       |                                      |      |                   | SAZ_0618,SAZ_0619                        | Up                 |
| 13  | 717229                    | C    | T                  | 5.23%                             | -       | SAZ_0692                             | Ns   | R316H             |                                          |                    |
| 14  | 725634                    | C    | G                  | 8.65%                             | -       | SAZ_0698                             | S    | G371G             |                                          |                    |
| 15  | 725653                    | C    | G                  | 7.69%                             | -       |                                      |      |                   | SAZ_0698,SAZ_0699                        | Dn                 |
| 16  | 750584                    | A    | C                  | 3.76%                             | -       | SAZ_0722                             | S    | A308A             |                                          |                    |
| 17  | 794578                    | G    | C                  | 4.89%                             | -       |                                      |      |                   | SAZ_0770,SAZ_0771                        | Dn                 |
| 18  | 829350                    | G    | A                  | 99.12%                            | 100%    | SAZ_0807                             | S    | L94L              |                                          |                    |
| 19  | 829393                    | C    | G                  | 98.96%                            | 100%    | SAZ_0807                             | Ns   | R109G             |                                          |                    |
| 20  | 865573                    | T    | C                  | 98.89%                            | 100%    | SAZ_0848                             | Ns   | K15E              |                                          |                    |
| 21  | 874584                    | A    | C                  | -                                 | 3.76%   |                                      |      |                   | SAZ_0858                                 | Dn                 |
| 22  | 887570                    | A    | C                  | -                                 | 3.50%   | SAZ_0870                             | Ns   | S15R              |                                          |                    |
| 23  | 890573                    | A    | C                  | -                                 | 3.76%   | SAZ_0877                             | Ns   | Q272P             |                                          |                    |
| 24  | 900483                    | A    | C                  | 3.36%                             | 7.01%   |                                      |      |                   | SAZ_0889,SAZ_0890,SAZ_0888               | Up, Dn             |
| 25  | 982662                    | A    | C                  | 4.76%                             | -       | SAZ_0972                             | Ns   | T13P              |                                          |                    |
| 26  | 1019712                   | C    | T                  | -                                 | 3.51%   | SAZ_1010                             | Ns   | G590D             |                                          |                    |
| 27  | 1023457                   | T    | G                  | 4.57%                             | -       | SAZ_1011                             | Ns   | V529G             |                                          |                    |
| 28  | 1023732                   | G    | A                  | -                                 | 7.08%   | SAZ_1011                             | Ns   | V621I             |                                          |                    |

|    |         |   |   |        |        |          |    |        |                   |        |
|----|---------|---|---|--------|--------|----------|----|--------|-------------------|--------|
| 29 | 1026677 | A | C | 7.19%  | 7.53%  | SAZ_1014 | Ns | H77P   |                   |        |
| 30 | 1029236 | T | G | 3.02%  | -      | SAZ_1016 | Ns | T307P  |                   |        |
| 31 | 1053304 | T | G | 3.38%  | -      | SAZ_1045 | S  | A63A   |                   |        |
| 32 | 1073978 | A | C | -      | 3.11%  | SAZ_1062 | Ns | T527P  |                   |        |
| 33 | 1102650 | C | G | 6.11%  | -      |          |    |        | SAZ_1092,SAZ_1093 | IR     |
| 34 | 1102657 | C | G | 9.62%  | -      |          |    |        | SAZ_1092,SAZ_1093 | IR     |
| 35 | 1104927 | G | C | 8.33%  | 10.59% |          |    |        | SAZ_1096,SAZ_1095 | Up, Dn |
| 36 | 1104936 | G | C | 13.54% | 13.64% |          |    |        | SAZ_1096,SAZ_1095 | Up, Dn |
| 37 | 1127129 | A | C | -      | 3%     | SAZ_1118 | Ns | V1147G |                   |        |
| 38 | 1152312 | C | A | 34.63% | 29.25% | SAZ_1139 | S  | V141V  |                   |        |
| 39 | 1152351 | C | G | 32.02% | 28.22% | SAZ_1139 | S  | A128A  |                   |        |
| 40 | 1152661 | C | G | 5.26%  | 6.39%  | SAZ_1139 | Ns | S25T   |                   |        |
| 41 | 1152666 | G | A | 3.35%  | 3.33%  | SAZ_1139 | S  | D23D   |                   |        |
| 42 | 1155091 | C | G | -      | 13.46% | SAZ_1141 | S  | P212P  |                   |        |
| 43 | 1195075 | T | G | -      | 3.39%  | SAZ_1165 | Ns | T180P  |                   |        |
| 44 | 1223137 | T | G | 3.36%  | -      | SAZ_1195 | Ns | N8T    |                   |        |
| 45 | 1257970 | A | C | -      | 4.61%  | SAZ_1227 | Ns | T57P   |                   |        |
| 46 | 1258765 | T | G | -      | 3.10%  | SAZ_1229 | Ns | N357H  |                   |        |
| 47 | 1321149 | A | C | -      | 3.18%  | SAZ_1284 | Ns | V116G  |                   |        |
| 48 | 1352616 | C | G | 4.21%  | -      | SAZ_1312 | S  | A46A   |                   |        |
| 49 | 1428347 | G | C | 100%   | 100%   | SAZ_1375 | Ns | A1197G |                   |        |
| 50 | 1428352 | G | C | 100%   | 100%   | SAZ_1375 | Ns | D1195E |                   |        |
| 51 | 1429342 | G | A | 45%    | 38%    | SAZ_1375 | S  | S865S  |                   |        |
| 52 | 1431395 | T | C | 4.97%  | 6.33%  | SAZ_1375 | Ns | Q181R  |                   |        |
| 53 | 1431598 | G | A | 13.87% | 14.62% | SAZ_1375 | S  | D113D  |                   |        |
| 54 | 1431612 | G | A | 12.65% | 12.65% | SAZ_1375 | S  | L109L  |                   |        |
| 55 | 1431639 | G | A | 8.93%  | 10.09% | SAZ_1375 | S  | L100L  |                   |        |
| 56 | 1431641 | G | A | 8.06%  | 8.72%  | SAZ_1375 | Ns | A99V   |                   |        |
| 57 | 1431654 | G | C | 3.66%  | 6.94%  | SAZ_1375 | Ns | P95A   |                   |        |
| 58 | 1431657 | G | - | 3.73%  | 3.93%  | SAZ_1375 | FS | R94fs  |                   |        |
| 59 | 1446132 | T | G | -      | 3.88%  | SAZ_1389 | Ns | F331C  |                   |        |
| 60 | 1465995 | - | G | 7.04%  | 4.35%  | SAZ_1406 | FS | M5fs   |                   |        |
| 61 | 1479016 | T | G | 3.57%  | -      | SAZ_1419 | Ns | T385P  |                   |        |
| 62 | 1540684 | T | G | -      | 5.07%  | SAZ_1473 | Ns | T117P  |                   |        |
| 63 | 1602208 | A | C | -      | 3.06%  | SAZ_1530 | Ns | T357P  |                   |        |

|    |         |         |    |        |        |          |    |         |                   |        |
|----|---------|---------|----|--------|--------|----------|----|---------|-------------------|--------|
| 64 | 1614211 | C       | T  | 42.64% | 41.84% | SAZ_1542 | Ns | E243K   |                   |        |
| 65 | 1621069 | C       | G  | 100%   | 100%   |          |    |         | SAZ_1549,SAZ_1550 | Up     |
| 66 | 1621072 | C       | G  | 100%   | 98.73% |          |    |         | SAZ_1549,SAZ_1550 | Up     |
| 67 | 1632665 | C       | T  | 5.08%  | -      | SAZ_1564 | Ns | P103S   |                   |        |
| 68 | 1634603 | T       | G  | 16.42% | -      |          |    |         | SAZ_1565,SAZ_1566 | Up, Dn |
| 69 | 1683141 | G       | C  | 7.64%  | -      |          |    |         | SAZ_1611          | Up     |
| 70 | 1683155 | G       | C  | 6.21%  | -      |          |    |         | SAZ_1611          | Up     |
| 71 | 1683161 | G       | C  | 14.89% | 7.78%  |          |    |         | SAZ_1611          | Up     |
| 72 | 1685295 | A       | C  | 3.61%  | -      | SAZ_1614 | Ns | T103P   |                   |        |
| 73 | 1703572 | G       | A  | -      | 6.86%  | SAZ_1623 | S  | A1612A  |                   |        |
| 74 | 1722049 | -       | GG | 3.70%  | 4.92%  |          |    |         | SAZ_1625,SAZ_1626 | Dn     |
| 75 | 1764863 | -       | A  | 25.78% | 20.20% | SAZ_1632 | FS | P811fs  |                   |        |
| 76 | 1775973 | C       | G  | 3.62%  | 10.86% | SAZ_1636 | S  | G424G   |                   |        |
| 77 | 1787509 | A       | C  | -      | 3.56%  | SAZ_1645 | Ns | V37G    |                   |        |
| 78 | 1813141 | C       | G  | 13.56% | -      | SAZ_1669 | Ns | A164P   |                   |        |
| 79 | 1813154 | C       | G  | 33.33% | -      | SAZ_1669 | S  | P159P   |                   |        |
| 80 | 1826689 | G       | C  | 3.70%  | -      |          |    |         | SAZ_1683,SAZ_1682 | Up, Dn |
| 81 | 1850944 | G       | A  | 11.65% | 22.09% | SAZ_1705 | S  | T434T   |                   |        |
| 82 | 1864425 | T       | G  | -      | 6.08%  | SAZ_1718 | Ns | T134P   |                   |        |
| 83 | 1864816 | C       | A  | 42.67% | 38.96% | SAZ_1718 | S  | P3P     |                   |        |
| 84 | 1908546 | A       | C  | -      | 3.69%  | SAZ_1760 | Ns | V297G   |                   |        |
| 85 | 1974343 | T       | G  | 3.48%  | -      |          |    |         | SAZ_1829,SAZ_1828 | Up, Dn |
| 86 | 1978485 | -       | GA | -      | 12.50% | SAZ_1831 | FS | T1140fs |                   |        |
| 87 | 1978496 | G       | A  | 45.16% | 59.62% | SAZ_1831 | Ns | T1136I  |                   |        |
| 88 | 1978508 | C       | -  | 13.04% | 19.61% | SAZ_1831 | FS | G1132fs |                   |        |
| 89 | 2029888 | T       | G  | 4.69%  | -      | SAZ_1881 | Ns | H207P   |                   |        |
| 90 | 2057581 | A       | -  | 95.97% | 92.72% |          |    |         | SAZ_1908          | Up     |
| 91 | 2057601 | T       | C  | 100%   | 99.21% |          |    |         | SAZ_1908          | Up     |
| 92 | 2057730 | TGTTTCG | -  | 77.85% | 77.57% |          |    |         | SAZ_1908          | Up     |
| 93 | 2073702 | C       | G  | 4.86%  | -      |          |    |         | SAZ_1918,SAZ_1917 | Up, Dn |
| 94 | 2079602 | A       | G  | 100%   | 100%   | SAZ_1923 | Ns | Q221R   |                   |        |
| 95 | 2079610 | A       | G  | 98.65% | 100%   | SAZ_1923 | Ns | T224A   |                   |        |
| 96 | 2079620 | G       | T  | 98.28% | 94%    | SAZ_1923 | Ns | G227V   |                   |        |
| 97 | 2135830 | T       | G  | -      | 3.59%  |          |    |         | SAZ_1973,SAZ_1974 | Up, Dn |
| 98 | 2146091 | A       | C  | -      | 3.10%  | SAZ_1981 | Ns | V85G    |                   |        |

|     |         |   |   |        |        |          |    |       |                            |        |
|-----|---------|---|---|--------|--------|----------|----|-------|----------------------------|--------|
| 99  | 2188229 | C | G | 3.18%  | -      | SAZ_2020 | S  | P255P |                            |        |
| 100 | 2189776 | C | G | 3.91%  | -      | SAZ_2021 | Ns | A181G |                            |        |
| 101 | 2199062 | T | G | 5.62%  | 7.38%  | SAZ_2030 | Ns | T483P |                            |        |
| 102 | 2206251 | C | T | 31.62% | 15.71% | SAZ_2036 | Ns | R232Q |                            |        |
| 103 | 2253313 | T | G | -      | 4.46%  |          |    |       | SAZ_2082                   | Dn     |
| 104 | 2253384 | C | T | 5.49%  | -      |          |    |       | SAZ_2082                   | Dn     |
| 105 | 2253414 | T | C | 4.18%  | 5.56%  |          |    |       | SAZ_2082                   | Dn     |
| 106 | 2253429 | C | A | -      | 3.43%  |          |    |       | SAZ_2082,SAZ_2083          | Dn     |
| 107 | 2253500 | A | G | -      | 4.62%  |          |    |       | SAZ_2082,SAZ_2083          | Dn     |
| 108 | 2271512 | A | C | 3.78%  | -      |          |    |       | SAZ_2100,SAZ_2102,SAZ_2101 | Up, Dn |
| 109 | 2365560 | G | C | 6.81%  | -      | SAZ_2192 | Ns | A106G |                            |        |
| 110 | 2366219 | G | T | 3.68%  | -      | SAZ_2193 | Ns | T7N   |                            |        |
| 111 | 2380515 | G | C | 98.46% | -      | SAZ_2206 | S  | P29P  |                            |        |
| 112 | 2415088 | G | A | 15.32% | 24.83% |          |    |       | SAZ_2241                   | Dn     |
| 113 | 2444422 | G | - | -      | 23.08% | SAZ_2269 | FS | R71fs |                            |        |
| 114 | 2446251 | T | G | -      | 5.30%  |          |    |       | SAZ_2270,SAZ_2271          | Up, Dn |
| 115 | 2456829 | T | G | -      | 3.29%  | SAZ_2281 | Ns | T445P |                            |        |
| 116 | 2527518 | G | A | 4.25%  | -      |          |    |       | SAZ_2346,SAZ_2347          | Up     |
| 117 | 2529583 | G | C | 6.43%  | -      |          |    |       | SAZ_2348,SAZ_2349          | Dn     |
| 118 | 2563317 | A | G | 9.13%  | 6.35%  | SAZ_2382 | S  | G937G |                            |        |
| 119 | 2563406 | G | T | 86.67% | 90.70% | SAZ_2382 | Ns | P908T |                            |        |
| 120 | 2563413 | T | C | -      | 98%    | SAZ_2382 | S  | S905S |                            |        |
| 121 | 2563429 | C | A | 97.13% | 99.39% | SAZ_2382 | Ns | G900V |                            |        |
| 122 | 2563446 | C | G | 99.56% | 99.50% | SAZ_2382 | S  | G894G |                            |        |
| 123 | 2563465 | G | T | 98.90% | 99.57% | SAZ_2382 | Ns | A888E |                            |        |
| 124 | 2563478 | T | C | 100%   | 100%   | SAZ_2382 | Ns | M884V |                            |        |
| 125 | 2563487 | G | T | 99.31% | 100%   | SAZ_2382 | Ns | Q881K |                            |        |
| 126 | 2563520 | G | T | 98.82% | 99.49% | SAZ_2382 | Ns | P870T |                            |        |
| 127 | 2564046 | A | C | 37.22% | 35.84% | SAZ_2382 | S  | G694G |                            |        |
| 128 | 2564121 | A | G | 22.62% | 26.28% | SAZ_2382 | S  | L669L |                            |        |
| 129 | 2565574 | C | G | 32.21% | 31.99% | SAZ_2382 | Ns | G185A |                            |        |
| 130 | 2578991 | T | G | -      | 5.67%  | SAZ_2395 | Ns | T542P |                            |        |
| 131 | 2601721 | T | G | 3.41%  | 3.59%  |          |    |       | SAZ_2416,SAZ_2417          | IR     |
| 132 | 2641081 | A | C | -      | 3%     | SAZ_2443 | Ns | V33G  |                            |        |
| 133 | 2643120 | A | C | -      | 3.88%  | SAZ_2448 | S  | G149G |                            |        |

|     |         |         |    |        |        |          |    |       |                   |    |
|-----|---------|---------|----|--------|--------|----------|----|-------|-------------------|----|
| 134 | 2647165 | T       | G  | 99.69% | 99.63% | SAZ_2458 | Ns | I27M  |                   |    |
| 135 | 2670417 | G       | T  | 100%   | 98.08% |          |    |       | SAZ_2485,SAZ_2486 | Up |
| 136 | 2690067 | C       | G  | 4.94%  | 7.14%  | SAZ_2501 | Ns | R50P  |                   |    |
| 137 | 2713580 | G       | C  | 23.61% | 16.39% |          |    |       | SAZ_2520,SAZ_2521 | Dn |
| 138 | 2713586 | -       | GA | 7.03%  | 7.69%  |          |    |       | SAZ_2520,SAZ_2521 | Dn |
| 139 | 2713603 | -       | C  | 10%    | -      |          |    |       | SAZ_2520,SAZ_2521 | Dn |
| 140 | 2713615 | G       | C  | 34.25% | 36.54% |          |    |       | SAZ_2520,SAZ_2521 | Dn |
| 141 | 2760201 | G       | C  | 5.03%  | -      |          |    |       | SAZ_2563,SAZ_2564 | Up |
| 142 | 2760205 | G       | C  | 6.96%  | 7.74%  |          |    |       | SAZ_2563,SAZ_2564 | Up |
| 143 | 2769273 | T       | G  | 6.83%  | 6.32%  | SAZ_2573 | Ns | V149G |                   |    |
| 144 | 2769289 | G       | C  | 4.23%  | 6.25%  | SAZ_2573 | S  | P154P |                   |    |
| 145 | 2770127 | A       | C  | 4%     | -      | SAZ_2574 | Ns | V258G |                   |    |
| 146 | 2794384 | A       | G  | -      | 3.54%  | SAZ_2595 | Ns | L53P  |                   |    |
| 147 | 2797669 | T       | C  | 4.02%  | -      | SAZ_2597 | Ns | S8P   |                   |    |
| 148 | 2809067 | C       | A  | 99.49% | 100%   | SAZ_2610 | Ns | A390S |                   |    |
| 149 | 2809088 | G       | T  | 99.46% | 100%   | SAZ_2610 | Ns | Q383K |                   |    |
| 150 | 2809094 | G       | T  | 100%   | 100%   | SAZ_2610 | Ns | R381S |                   |    |
| 151 | 2809675 | A       | T  | 99.18% | 98.65% | SAZ_2610 | Ns | V187D |                   |    |
| 152 | 2809689 | G       | C  | 100%   | 100%   | SAZ_2610 | Ns | F182L |                   |    |
| 153 | 2809692 | G       | C  | 100%   | 100%   | SAZ_2610 | Ns | D181E |                   |    |
| 154 | 2809695 | A       | G  | 100%   | 98.81% | SAZ_2610 | S  | D180D |                   |    |
| 155 | 2809716 | T       | G  | 100%   | 97.87% | SAZ_2610 | S  | I173I |                   |    |
| 156 | 2809724 | A       | G  | 97.90% | 98.98% | SAZ_2610 | Ns | W171R |                   |    |
| 157 | 2809727 | T       | G  | 100%   | 98.94% | SAZ_2610 | Ns | N170H |                   |    |
| 158 | 2809752 | G       | C  | 100%   | 100%   | SAZ_2610 | S  | A161A |                   |    |
| 159 | 2824776 | C       | G  | 7.77%  | -      | SAZ_2625 | Ns | A756P |                   |    |
| 160 | 2824785 | T       | G  | 20.69% | -      | SAZ_2625 | Ns | T753P |                   |    |
| 161 | 2824790 | C       | G  | 17.33% | 19.67% | SAZ_2625 | Ns | R751P |                   |    |
| 162 | 2824796 | T       | G  | 6.93%  | -      | SAZ_2625 | Ns | H749P |                   |    |
| 163 | 2825154 | C       | G  | 4.94%  | 6.06%  | SAZ_2625 | Ns | A630P |                   |    |
| 164 | 2852711 | T       | G  | 3.63%  | -      | SAZ_2647 | Ns | T352P |                   |    |
| 165 | 2871855 | T       | G  | 9.58%  | 10.07% | SAZ_2662 | Ns | T216P |                   |    |
| 166 | 2933742 | C       | A  | 36.68% | 27.66% | SAZ_2721 | Ns | V170F |                   |    |
| 167 | 2943953 | A       | -  | 94.84% | 94.13% |          |    |       | SAZ_2725          | Up |
| 168 | 2944102 | TGTTCCG | -  | 77.84% | 80.24% |          |    |       | SAZ_2725          | Up |

|     |         |   |   |        |        |          |    |       |                   |        |
|-----|---------|---|---|--------|--------|----------|----|-------|-------------------|--------|
| 169 | 2955650 | C | A | 3.41%  | 3.76%  | SAZ_2735 | Ns | A55S  |                   |        |
| 170 | 2964936 | G | T | 100%   | 100%   | SAZ_2744 | Ns | P118H |                   |        |
| 171 | 3033409 | T | G | -      | 6.67%  | SAZ_2816 | Ns | T97P  |                   |        |
| 172 | 3050361 | G | C | -      | 3.79%  |          |    |       | SAZ_2833,SAZ_2834 | Up, Dn |
| 173 | 3105319 | A | G | 8.21%  | -      |          |    |       | SAZ_2885,SAZ_2884 | Up, Dn |
| 174 | 3107253 | G | - | 3.58%  | -      |          |    |       | SAZ_2887,SAZ_2888 | Up, Dn |
| 175 | 3131029 | G | C | 6.10%  | -      | SAZ_2908 | Ns | A42P  |                   |        |
| 176 | 3152310 | G | C | 9.45%  | -      | SAZ_2922 | Ns | A7P   |                   |        |
| 177 | 3157805 | T | G | -      | 3.30%  | SAZ_2928 | Ns | S89R  |                   |        |
| 178 | 3158238 | A | C | 98.97% | 100%   |          |    |       | SAZ_2928,SAZ_2929 | Up     |
| 179 | 3158254 | C | A | 98.15% | 100%   | SAZ_2929 | Ns | L4M   |                   |        |
| 180 | 3158271 | C | A | 100%   | 98.86% | SAZ_2929 | S  | S9S   |                   |        |
| 181 | 3158301 | A | G | 98.75% | 100%   | SAZ_2929 | Ns | I19M  |                   |        |
| 182 | 3158309 | C | A | 100%   | 100%   | SAZ_2929 | Ns | A22D  |                   |        |
| 183 | 3158316 | A | G | 100%   | -      | SAZ_2929 | S  | R24R  |                   |        |
| 184 | 3158320 | G | T | 100%   | -      | SAZ_2929 | Ns | V26F  |                   |        |
| 185 | 3162544 | C | G | -      | 4.58%  | SAZ_2931 | S  | P181P |                   |        |
| 186 | 3164873 | C | G | 3.73%  | 4.59%  | SAZ_2932 | Ns | A360P |                   |        |
| 187 | 3167920 | C | G | 4.40%  | 8.45%  | SAZ_2934 | Ns | A281G |                   |        |
| 188 | 3169895 | T | C | 3.46%  | 8.24%  | SAZ_2935 | Ns | E702G |                   |        |
| 189 | 3210749 | C | T | 5.03%  | -      | SAZ_2977 | S  | P52P  |                   |        |
| 190 | 3273560 | G | C | 95%    | -      | SAZ_3031 | Ns | A99G  |                   |        |
| 191 | 3273581 | G | C | 95.59% | 100%   | SAZ_3031 | Ns | P92R  |                   |        |
| 192 | 3273608 | G | C | 99.32% | 99.43% | SAZ_3031 | Ns | A83G  |                   |        |
| 193 | 3304392 | C | G | 5.65%  | 9.02%  |          |    |       | SAZ_3061,SAZ_3062 | Up     |
| 194 | 3312913 | A | T | 6.63%  | 4.17%  |          |    |       | SAZ_3069          | Dn     |
| 195 | 3334355 | G | C | 3.10%  | 3.77%  |          |    |       | SAZ_3090,SAZ_3091 | Dn     |
| 196 | 3334360 | G | C | 8.06%  | 10.78% |          |    |       | SAZ_3090,SAZ_3091 | Dn     |
| 197 | 3379969 | T | G | 4.20%  | 4.65%  | SAZ_3134 | Ns | H445P |                   |        |
| 198 | 3381337 | G | A | 100%   | 100%   |          |    |       | SAZ_3134          | Up     |
| 199 | 3386874 | A | C | -      | 7.20%  | SAZ_3141 | Ns | F119C |                   |        |
| 200 | 3387184 | T | G | 3.06%  | 8.51%  | SAZ_3141 | Ns | T16P  |                   |        |
| 201 | 3387193 | T | G | -      | 4.40%  | SAZ_3141 | Ns | T13P  |                   |        |
| 202 | 3391862 | G | C | 29.41% | 31.25% |          |    |       | SAZ_3146,SAZ_3145 | Up, Dn |
| 203 | 3391866 | G | C | 20.34% | 16.13% |          |    |       | SAZ_3146,SAZ_3145 | Up, Dn |



|     |         |     |   |        |        |          |       |            |                   |        |
|-----|---------|-----|---|--------|--------|----------|-------|------------|-------------------|--------|
| 204 | 3391870 | T   | C | -      | 19.70% |          |       |            | SAZ_3146,SAZ_3145 | Up, Dn |
| 205 | 3408950 | A   | C | -      | 4.11%  | SAZ_3160 | Ns    | V303G      |                   |        |
| 206 | 3409834 | C   | G | -      | 8.82%  | SAZ_3160 | S     | P8P        |                   |        |
| 207 | 3409842 | C   | G | 11.67% | -      | SAZ_3160 | Ns    | A6P        |                   |        |
| 208 | 3409878 | C   | G | -      | 9.41%  |          |       |            | SAZ_3160,SAZ_3161 | Up, Dn |
| 209 | 3409885 | C   | G | -      | 9.76%  |          |       |            | SAZ_3160,SAZ_3161 | Up, Dn |
| 210 | 3438760 | A   | C | -      | 3.07%  | SAZ_3190 | Ns    | L345R      |                   |        |
| 211 | 3443728 | G   | C | 5.30%  | -      |          |       |            | SAZ_3193,SAZ_3194 | Up     |
| 212 | 3443734 | G   | C | 4.05%  | -      |          |       |            | SAZ_3193,SAZ_3194 | Up     |
| 213 | 3501824 | GAT | - | 21.62% | 18.42% | SAZ_3258 | nonFS | 361_361del |                   |        |
| 214 | 3507525 | C   | G | 5.19%  | -      |          |       |            | SAZ_3263          | Up     |
| 215 | 3507529 | C   | G | 10.40% | -      |          |       |            | SAZ_3263          | Up     |
| 216 | 3508510 | C   | T | 98.80% | 99.32% |          |       |            | SAZ_3263,SAZ_3264 | Dn     |
| 217 | 3508535 | -   | T | 32.14% | -      |          |       |            | SAZ_3263,SAZ_3264 | Dn     |
| 218 | 3508553 | C   | G | 100%   | 15%    |          |       |            | SAZ_3263,SAZ_3264 | Dn     |
| 219 | 3508569 | G   | C | 100%   | 100%   |          |       |            | SAZ_3263,SAZ_3264 | Dn     |
| 220 | 3526694 | C   | G | 100%   | 98.53% | SAZ_3282 | Ns    | V262L      |                   |        |
| 221 | 3539327 | T   | G | 3.15%  | -      | SAZ_3299 | Ns    | T680P      |                   |        |
| 222 | 3547063 | T   | G | -      | 3.29%  | SAZ_3304 | Ns    | V488G      |                   |        |
| 223 | 3559196 | T   | G | 10.13% | -      | SAZ_3318 | Ns    | H42P       |                   |        |
| 224 | 3569010 | A   | C | -      | 7.22%  | SAZ_3328 | Ns    | H202P      |                   |        |
| 225 | 3569290 | G   | C | 7.87%  | -      | SAZ_3328 | S     | P295P      |                   |        |
| 226 | 3569296 | G   | C | 7.76%  | 5.56%  | SAZ_3328 | S     | P297P      |                   |        |
| 227 | 3607011 | A   | C | 3.11%  | -      | SAZ_3363 | Ns    | V213G      |                   |        |
| 228 | 3614856 | T   | G | -      | 3.60%  |          |       |            | SAZ_3370,SAZ_3371 | Dn     |
| 229 | 3614861 | T   | G | 3.93%  | -      |          |       |            | SAZ_3370,SAZ_3371 | Dn     |
| 230 | 3622775 | A   | C | -      | 4.21%  | SAZ_3378 | Ns    | T663P      |                   |        |
| 231 | 3623408 | A   | C | 3.24%  | -      | SAZ_3378 | Ns    | T874P      |                   |        |
| 232 | 3628030 | G   | C | 7.69%  | 6.67%  | SAZ_3380 | Ns    | R213P      |                   |        |
| 233 | 3628039 | G   | C | 6.08%  | 12.90% | SAZ_3380 | Ns    | R216P      |                   |        |
| 234 | 3631842 | G   | C | 18.10% | 13.10% |          |       |            | SAZ_3386,SAZ_3385 | Up, Dn |
| 235 | 3640547 | T   | G | 4.97%  | -      |          |       |            | SAZ_3393,SAZ_3394 | Up, Dn |
| 236 | 3651736 | C   | G | 3.91%  | 3.29%  | SAZ_3402 | Ns    | A10P       |                   |        |
| 237 | 3659892 | C   | T | 3.37%  | -      |          |       |            | SAZ_3412,SAZ_3413 | Dn     |
| 238 | 3660590 | T   | G | -      | 5.52%  | SAZ_3413 | Ns    | T180P      |                   |        |

|     |         |   |   |        |        |          |    |       |                   |        |
|-----|---------|---|---|--------|--------|----------|----|-------|-------------------|--------|
| 239 | 3661216 | C | G | 6.02%  | 8.20%  |          |    |       | SAZ_3413          | Up     |
| 240 | 3664997 | T | G | 3.49%  | -      | SAZ_3418 | Ns | V174G |                   |        |
| 241 | 3676800 | A | G | 98.57% | 98.41% |          |    |       | SAZ_3427,SAZ_3426 | Up, Dn |
| 242 | 3680271 | G | C | 5.61%  | 6.04%  |          |    |       | SAZ_3430,SAZ_3429 | Up, Dn |
| 243 | 3680278 | G | C | 10.15% | 11.27% |          |    |       | SAZ_3430,SAZ_3429 | Up, Dn |
| 244 | 3680281 | G | C | 5.76%  | 6.34%  |          |    |       | SAZ_3430,SAZ_3429 | Up, Dn |
| 245 | 3680294 | G | C | 7.88%  | 4.05%  |          |    |       | SAZ_3430,SAZ_3429 | Up, Dn |
| 246 | 3686020 | G | C | 3.85%  | 4.72%  |          |    |       | SAZ_3435,SAZ_3434 | Up, Dn |
| 247 | 3694482 | G | C | 100%   | 100%   |          |    |       | SAZ_3440,SAZ_3441 | Up, Dn |
| 248 | 3748290 | G | - | 5%     | -      | SAZ_3494 | FS | T67fs |                   |        |
| 249 | 3748490 | T | G | 6.80%  | 9.97%  | SAZ_3494 | Ns | M1L   |                   |        |
| 250 | 3760667 | C | G | 4.23%  | -      | SAZ_3504 | S  | P50P  |                   |        |
| 251 | 3765571 | T | C | 99.55% | 99.47% | SAZ_3509 | S  | Q233Q |                   |        |
| 252 | 3789710 | G | C | 3.46%  | 3.26%  | SAZ_3532 | Ns | R34G  |                   |        |
| 253 | 3838267 | T | - | 36.49% | -      |          |    |       | SAZ_3573,SAZ_3572 | Up, Dn |
| 254 | 3846539 | T | G | -      | 5.96%  |          |    |       | SAZ_3578,SAZ_3579 | Dn     |
| 255 | 3857357 | T | G | -      | 3.46%  | SAZ_3587 | Ns | E19A  |                   |        |
| 256 | 3869592 | T | C | 10.64% | 9.24%  | SAZ_3597 | Ns | L421P |                   |        |
| 257 | 3869598 | T | C | 9.25%  | 9.74%  | SAZ_3597 | Ns | L423P |                   |        |
| 258 | 3869601 | G | C | 8.36%  | 7.17%  | SAZ_3597 | Ns | R424P |                   |        |
| 259 | 3869607 | T | C | 5.88%  | 5.42%  | SAZ_3597 | Ns | L426P |                   |        |
| 260 | 3872667 | G | C | 100%   | 98.33% |          |    |       | SAZ_3601          | Dn     |
| 261 | 3873609 | T | G | 5.07%  | 4.33%  | SAZ_3602 | Ns | V214G |                   |        |
| 262 | 3882105 | G | A | 50.77% | 38.03% | SAZ_3609 | S  | G106G |                   |        |
| 263 | 3882135 | G | C | 65.85% | 62.82% | SAZ_3609 | Ns | Q116H |                   |        |
| 264 | 3882138 | C | T | 66.13% | 62.65% | SAZ_3609 | S  | G117G |                   |        |
| 265 | 3882156 | G | T | 78.36% | 75.26% | SAZ_3609 | S  | P123P |                   |        |
| 266 | 3882165 | G | C | 81.38% | 79.08% | SAZ_3609 | S  | P126P |                   |        |
| 267 | 3882198 | C | A | 7.59%  | 6.60%  | SAZ_3609 | S  | G137G |                   |        |
| 268 | 3892351 | G | C | 4.27%  | -      | SAZ_3618 | Ns | A147G |                   |        |
| 269 | 3894107 | G | C | 8.88%  | 8.68%  | SAZ_3619 | S  | G153G |                   |        |
| 270 | 3894111 | G | C | 7.03%  | 5.88%  | SAZ_3619 | Ns | A152G |                   |        |
| 271 | 3894115 | G | C | 6.37%  | 5.02%  | SAZ_3619 | Ns | R151G |                   |        |
| 272 | 3894119 | G | C | 4.80%  | 3.91%  | SAZ_3619 | S  | R149R |                   |        |
| 273 | 3925048 | C | T | 98.91% | 98.56% |          |    |       | SAZ_3645,SAZ_3646 | Up     |

|     |         |   |   |        |        |                   |    |       |                   |        |
|-----|---------|---|---|--------|--------|-------------------|----|-------|-------------------|--------|
| 274 | 3925060 | C | G | 100%   | 99.60% |                   |    |       | SAZ_3645,SAZ_3646 | Up     |
| 275 | 3925084 | C | A | 99.42% | 98.80% |                   |    |       | SAZ_3645,SAZ_3646 | Up     |
| 276 | 3925089 | A | T | 99.34% | 99.35% |                   |    |       | SAZ_3645,SAZ_3646 | Up     |
| 277 | 3925093 | C | A | 100%   | 99.25% |                   |    |       | SAZ_3645,SAZ_3646 | Up     |
| 278 | 3925170 | G | C | 4.79%  | -      |                   |    |       | SAZ_3646          | Up     |
| 279 | 3959063 | A | C | 6.81%  | 4.48%  |                   |    |       | SAZ_3668,SAZ_3667 | Up, Dn |
| 280 | 4030865 | C | G | 4.85%  | 3.79%  |                   |    |       | SAZ_3727          | Dn     |
| 281 | 4043008 | G | T | 100%   | 100%   |                   |    |       | SAZ_3738,SAZ_3739 | IR     |
| 282 | 4043014 | G | T | 100%   | 100%   |                   |    |       | SAZ_3738,SAZ_3739 | IR     |
| 283 | 4043047 | G | T | 99.42% | 99.39% |                   |    |       | SAZ_3738,SAZ_3739 | IR     |
| 284 | 4043084 | A | G | 100%   | 100%   |                   |    |       | SAZ_3738,SAZ_3739 | IR     |
| 285 | 4043180 | A | T | 20%    | 22.06% |                   |    |       | SAZ_3738,SAZ_3739 | IR     |
| 286 | 4043227 | G | T | 25.41% | 24.87% |                   |    |       | SAZ_3738,SAZ_3739 | IR     |
| 287 | 4043235 | C | T | 25.99% | 28.06% |                   |    |       | SAZ_3738,SAZ_3739 | IR     |
| 288 | 4043304 | - | G | 26.89% | 33.61% |                   |    |       | SAZ_3739          | Dn     |
| 289 | 4043381 | A | G | 27.47% | 26.76% |                   |    |       | SAZ_3739          | Dn     |
| 290 | 4043455 | C | G | 14.40% | 19.49% |                   |    |       | SAZ_3739          | Dn     |
| 291 | 4078994 | T | G | 3.12%  | -      |                   |    |       | SAZ_3778,SAZ_3777 | Up, Dn |
| 292 | 4083090 | C | T | 99.25% | 99.64% | SAZ_3781          | Ns | P43L  |                   |        |
| 293 | 4084423 | A | T | 46.81% | 41.19% | SAZ_3783          | Ns | V481E |                   |        |
| 294 | 4133316 | G | C | 10.75% | 12.43% | SAZ_3832          | Ns | R61G  |                   |        |
| 295 | 4133385 | G | C | 4.67%  | 4.90%  | SAZ_3832          | Ns | R38G  |                   |        |
| 296 | 4134391 | A | C | 3.49%  | 3.21%  | SAZ_3833          | Ns | T308P |                   |        |
| 297 | 4138640 | C | A | 8.07%  | 4.61%  |                   |    |       | SAZ_3836          | Dn     |
| 298 | 4138646 | G | A | 4.71%  | 5.48%  |                   |    |       | SAZ_3836          | Dn     |
| 299 | 4156743 | T | G | -      | 3.91%  | SAZ_3850,SAZ_3851 | Ns | N45T  |                   |        |
| 300 | 4161326 | C | G | 6.30%  | 3.57%  | SAZ_3860          | S  | G74G  |                   |        |
| 301 | 4161329 | C | G | 10.24% | 9.50%  | SAZ_3860          | S  | G75G  |                   |        |
| 302 | 4161336 | C | G | 11.67% | 12.96% | SAZ_3860          | Ns | R78G  |                   |        |
| 303 | 4161341 | C | G | 9.52%  | 11.46% | SAZ_3860          | S  | G79G  |                   |        |
| 304 | 4167729 | C | - | 57.45% | 65%    |                   |    |       | SAZ_3862,SAZ_3863 | Dn     |
| 305 | 4167743 | - | T | 13.75% | 17.50% |                   |    |       | SAZ_3862,SAZ_3863 | Dn     |
| 306 | 4168364 | G | C | 32.81% | 34%    | SAZ_3863          | Ns | R364G |                   |        |
| 307 | 4168367 | A | C | 15.25% | -      | SAZ_3863          | Ns | W363G |                   |        |
| 308 | 4168371 | G | C | 24.68% | 28.81% | SAZ_3863          | S  | G361G |                   |        |

|     |         |         |   |        |        |          |    |        |                   |        |
|-----|---------|---------|---|--------|--------|----------|----|--------|-------------------|--------|
| 309 | 4168377 | G       | C | 15.28% | 15.62% | SAZ_3863 | S  | G359G  |                   |        |
| 310 | 4183545 | G       | T | -      | 7.49%  | SAZ_3874 | Ns | P1341T |                   |        |
| 311 | 4198141 | C       | A | 99.01% | 97.67% | SAZ_3885 | Ns | G25V   |                   |        |
| 312 | 4198147 | C       | A | 98.67% | 96.77% | SAZ_3885 | Ns | G23V   |                   |        |
| 313 | 4211245 | A       | - | 93.66% | 93.20% |          |    |        | SAZ_3895,SAZ_3896 | IR     |
| 314 | 4211394 | TGTTTCG | - | 79.19% | 77.44% |          |    |        | SAZ_3895,SAZ_3896 | IR     |
| 315 | 4220198 | -       | A | 5.29%  | -      |          |    |        | SAZ_3896,SAZ_3897 | IR     |
| 316 | 4220236 | A       | G | 12.66% | -      |          |    |        | SAZ_3896,SAZ_3897 | IR     |
| 317 | 4238490 | G       | A | -      | 5.53%  |          |    |        | SAZ_3911          | Up     |
| 318 | 4272356 | T       | G | -      | 3.34%  |          |    |        | SAZ_3945          | Dn     |
| 319 | 4288943 | C       | G | 4.68%  | 4%     |          |    |        | SAZ_3961,SAZ_3962 | Up, Dn |
| 320 | 4315439 | G       | T | 99.24% | 100%   | SAZ_3986 | Ns | R54M   |                   |        |
| 321 | 4315453 | G       | T | 99.61% | 99.12% | SAZ_3986 | Ns | A59S   |                   |        |
| 322 | 4315475 | G       | A | 98.65% | 99.51% | SAZ_3986 | Ns | R66H   |                   |        |
| 323 | 4315498 | C       | A | 100%   | 100%   | SAZ_3986 | Ns | L74I   |                   |        |
| 324 | 4315520 | C       | T | 97.35% | 98.45% | SAZ_3986 | Ns | T81I   |                   |        |
| 325 | 4315537 | C       | A | 100%   | -      | SAZ_3986 | Ns | P87T   |                   |        |
| 326 | 4315543 | A       | C | 100%   | 100%   | SAZ_3986 | Ns | M89L   |                   |        |
| 327 | 4315546 | C       | A | 100%   | -      | SAZ_3986 | Ns | P90T   |                   |        |
| 328 | 4315547 | C       | A | 100%   | -      | SAZ_3986 | Ns | P90Q   |                   |        |
| 329 | 4319510 | C       | G | -      | 4.18%  |          |    |        | SAZ_3989,SAZ_3990 | Dn     |
| 330 | 4348859 | G       | C | 9.36%  | 10.12% | SAZ_4016 | S  | G32G   |                   |        |
| 331 | 4348872 | T       | C | 12.59% | 16.15% | SAZ_4016 | Ns | W37R   |                   |        |
| 332 | 4348968 | G       | A | -      | 3.07%  | SAZ_4016 | Ns | V69I   |                   |        |
| 333 | 4348995 | A       | C | -      | 3.63%  | SAZ_4016 | S  | R78R   |                   |        |
| 334 | 4349097 | T       | C | 3.37%  | -      | SAZ_4016 | Ns | W112R  |                   |        |
| 335 | 4349108 | C       | A | 3.40%  | -      | SAZ_4016 | S  | S115S  |                   |        |
| 336 | 4349229 | A       | C | -      | 3.47%  |          |    |        | SAZ_4016,SAZ_4017 | Dn     |
| 337 | 4368223 | C       | A | 99.04% | 100%   |          |    |        | SAZ_4030          | Dn     |
| 338 | 4368226 | C       | A | 98.95% | 100%   |          |    |        | SAZ_4030          | Dn     |
| 339 | 4368231 | G       | - | 6.14%  | 10.26% |          |    |        | SAZ_4030          | Dn     |
| 340 | 4368257 | C       | - | 75.53% | 78.16% |          |    |        | SAZ_4030          | Dn     |
| 341 | 4368269 | C       | T | 100%   | 100%   |          |    |        | SAZ_4030          | Dn     |
| 342 | 4388418 | A       | C | -      | 3.95%  |          |    |        | SAZ_4046          | Up     |
| 343 | 4389340 | G       | C | -      | 5.37%  | SAZ_4046 | S  | P230P  |                   |        |

|     |         |   |       |        |        |          |    |       |                   |        |
|-----|---------|---|-------|--------|--------|----------|----|-------|-------------------|--------|
| 344 | 4405089 | - | CAGC  | -      | 3.40%  |          |    |       | SAZ_4062,SAZ_4063 | Up, Dn |
| 345 | 4422002 | G | T     | 47.61% | 41.42% |          |    |       | SAZ_4077,SAZ_4078 | IR     |
| 346 | 4432377 | A | C     | 4.37%  | 6.51%  |          |    |       | SAZ_4093,SAZ_4094 | Up, Dn |
| 347 | 4432382 | G | C     | 9.77%  | 12.93% |          |    |       | SAZ_4093,SAZ_4094 | Up, Dn |
| 348 | 4432388 | G | C     | 7.52%  | 8.16%  |          |    |       | SAZ_4093,SAZ_4094 | Up, Dn |
| 349 | 4432393 | G | C     | -      | 3.92%  |          |    |       | SAZ_4093,SAZ_4094 | Up, Dn |
| 350 | 4439509 | T | C     | -      | 5.05%  | SAZ_4102 | Ns | T623A |                   |        |
| 351 | 4442880 | A | C     | -      | 3.16%  | SAZ_4103 | Ns | T420P |                   |        |
| 352 | 4446996 | C | A     | 99.46% | 98.54% |          |    |       | SAZ_4107,SAZ_4108 | IR     |
| 353 | 4447003 | C | A     | 99.02% | 100%   |          |    |       | SAZ_4107,SAZ_4108 | IR     |
| 354 | 4447041 | G | T     | 100%   | 98.51% |          |    |       | SAZ_4108          | Up     |
| 355 | 4447048 | C | A     | 97.79% | 99.04% |          |    |       | SAZ_4108          | Up     |
| 356 | 4448580 | T | G     | -      | 10.11% |          |    |       | SAZ_4109,SAZ_4110 | IR     |
| 357 | 4448586 | T | G     | 9.76%  | 7.95%  |          |    |       | SAZ_4109,SAZ_4110 | IR     |
| 358 | 4448593 | T | G     | -      | 6.25%  |          |    |       | SAZ_4109,SAZ_4110 | IR     |
| 359 | 4448598 | T | G     | -      | 8.33%  |          |    |       | SAZ_4109,SAZ_4110 | IR     |
| 360 | 4450930 | T | G     | -      | 6.48%  | SAZ_4111 | Ns | V364G |                   |        |
| 361 | 4450933 | C | G     | 3.60%  | 4%     | SAZ_4111 | Ns | A365G |                   |        |
| 362 | 4450937 | C | G     | 4.27%  | 6.13%  | SAZ_4111 | S  | G366G |                   |        |
| 363 | 4451285 | C | G     | 10.08% | 10.88% |          |    |       | SAZ_4111,SAZ_4112 | Dn     |
| 364 | 4456220 | A | C     | -      | 3.25%  |          |    |       | SAZ_4115,SAZ_4116 | Dn     |
| 365 | 4461545 | A | C     | 9.84%  | 7.69%  |          |    |       | SAZ_4120,SAZ_4119 | Up, Dn |
| 366 | 4461551 | A | C     | 5.41%  | 8.67%  |          |    |       | SAZ_4120,SAZ_4119 | Up, Dn |
| 367 | 4474705 | G | A     | 3.98%  | -      | SAZ_4132 | Ns | A132V |                   |        |
| 368 | 4484704 | A | C     | -      | 3.51%  | SAZ_4143 | S  | G119G |                   |        |
| 369 | 4512619 | G | C     | 4.26%  | 6.55%  |          |    |       | SAZ_4171,SAZ_4170 | Up, Dn |
| 370 | 4512633 | - | CGAAA | 12.02% | -      |          |    |       | SAZ_4171,SAZ_4170 | Up, Dn |
| 371 | 4512638 | - | GT    | 6.86%  | 4.89%  |          |    |       | SAZ_4171,SAZ_4170 | Up, Dn |
| 372 | 4523380 | T | G     | -      | 8.14%  |          |    |       | SAZ_4178,SAZ_4179 | Dn     |
| 373 | 4523390 | T | G     | 16.67% | -      |          |    |       | SAZ_4178,SAZ_4179 | Dn     |
| 374 | 4523395 | C | G     | 16.87% | -      |          |    |       | SAZ_4178,SAZ_4179 | Dn     |
| 375 | 4564295 | G | C     | 6.63%  | 5.61%  |          |    |       | SAZ_4216,SAZ_4215 | Up, Dn |
| 376 | 4564299 | G | C     | 4.83%  | 4.71%  |          |    |       | SAZ_4216,SAZ_4215 | Up, Dn |
| 377 | 4565125 | C | T     | -      | 5.25%  | SAZ_4216 | S  | V267V |                   |        |
| 378 | 4566051 | A | C     | -      | 3.49%  | SAZ_4218 | Ns | W144G |                   |        |

|     |         |         |   |        |        |          |          |       |                   |        |
|-----|---------|---------|---|--------|--------|----------|----------|-------|-------------------|--------|
| 379 | 4566794 | T       | G | 81.82% | 80.46% |          |          |       | SAZ_4219          | Up     |
| 380 | 4566820 | G       | T | 100%   | 100%   |          |          |       | SAZ_4219          | Up     |
| 381 | 4571147 | A       | C | 5.43%  | -      |          |          |       | SAZ_4222,SAZ_4223 | Up, Dn |
| 382 | 4571153 | G       | C | 6.80%  | 5.38%  |          |          |       | SAZ_4222,SAZ_4223 | Up, Dn |
| 383 | 4615553 | A       | C | 3.41%  | 6.17%  | SAZ_4262 | StopLoss | *330S |                   |        |
| 384 | 4615557 | C       | A | 39.91% | 50%    |          |          |       | SAZ_4262,SAZ_4263 | Dn     |
| 385 | 4615562 | C       | G | 5.83%  | -      |          |          |       | SAZ_4262,SAZ_4263 | Dn     |
| 386 | 4615564 | A       | C | 3.81%  | 3.81%  |          |          |       | SAZ_4262,SAZ_4263 | Dn     |
| 387 | 4623190 | A       | C | 3.15%  | -      | SAZ_4270 | Ns       | M1R   |                   |        |
| 388 | 4678173 | C       | G | 22.73% | 10.67% | SAZ_4336 | Ns       | A553P |                   |        |
| 389 | 4692608 | -       | G | 17.48% | 20%    |          |          |       | SAZ_4348          | UTR5   |
| 390 | 4743050 | C       | T | -      | 3.26%  |          |          |       | SAZ_4400          | Dn     |
| 391 | 4744698 | G       | A | 4.85%  | 3.07%  |          |          |       | SAZ_4401,SAZ_4402 | IR     |
| 392 | 4749899 | T       | G | 3.31%  | 3.93%  |          |          |       | SAZ_4405,SAZ_4406 | Dn     |
| 393 | 4758240 | G       | - | -      | 4.38%  |          |          |       | SAZ_4412,SAZ_4413 | Up     |
| 394 | 4779815 | T       | G | -      | 3.11%  | SAZ_4432 | Ns       | T21P  |                   |        |
| 395 | 4793112 | A       | C | -      | 3.68%  |          |          |       | SAZ_4445,SAZ_4446 | Up, Dn |
| 396 | 4793120 | A       | C | 5.10%  | 5.75%  |          |          |       | SAZ_4445,SAZ_4446 | Up, Dn |
| 397 | 4793567 | C       | T | 34.39% | 29.67% | SAZ_4446 | S        | L272L |                   |        |
| 398 | 4796460 | A       | - | 92.90% | 92.45% |          |          |       | SAZ_4448          | Up     |
| 399 | 4796482 | T       | C | 99.54% | 99.62% |          |          |       | SAZ_4448          | Up     |
| 400 | 4796609 | TGTTTCG | - | 68.99% | 63.92% |          |          |       | SAZ_4448          | Up     |
| 401 | 4830172 | A       | C | 3.12%  | 4.65%  | SAZ_4470 | Ns       | V223G |                   |        |
| 402 | 4834424 | T       | G | 5.17%  | 5.56%  | SAZ_4475 | Ns       | T74P  |                   |        |
| 403 | 4857455 | C       | G | 3.76%  | 3.35%  | SAZ_4495 | S        | A20A  |                   |        |
| 404 | 4894220 | C       | G | -      | 4.62%  | SAZ_4528 | Ns       | A882P |                   |        |
| 405 | 4900369 | C       | G | -      | 6.69%  | SAZ_4534 | Ns       | G205A |                   |        |
| 406 | 4906277 | C       | T | 99.38% | 99.42% |          |          |       | SAZ_4537          | Dn     |
| 407 | 4906288 | C       | A | 99.53% | 100%   |          |          |       | SAZ_4537          | Dn     |
| 408 | 4906316 | G       | T | 98.38% | 100%   |          |          |       | SAZ_4537          | Dn     |
| 409 | 4906325 | G       | T | 98.75% | 99.35% |          |          |       | SAZ_4537          | Dn     |
| 410 | 4906519 | G       | C | 99.68% | 99.73% |          |          |       | SAZ_4538          | Up     |
| 411 | 4937034 | C       | G | 5.57%  | 4.74%  | SAZ_4571 | Ns       | G584R |                   |        |
| 412 | 4937039 | C       | G | 3.75%  | 3.80%  | SAZ_4571 | Ns       | R582P |                   |        |
| 413 | 4937044 | C       | G | 7.71%  | 6.59%  | SAZ_4571 | S        | P580P |                   |        |

|     |         |   |   |        |        |          |    |       |                   |        |
|-----|---------|---|---|--------|--------|----------|----|-------|-------------------|--------|
| 414 | 4937052 | T | G | -      | 3.73%  | SAZ_4571 | Ns | T578P |                   |        |
| 415 | 4942967 | T | G | 3.10%  | -      | SAZ_4578 | Ns | Y40D  |                   |        |
| 416 | 4955156 | G | C | 3.37%  | 5.86%  | SAZ_4593 | Ns | R29P  |                   |        |
| 417 | 4955160 | G | C | -      | 3.31%  | SAZ_4593 | S  | P30P  |                   |        |
| 418 | 4974877 | C | G | -      | 10.84% |          |    |       | SAZ_4609,SAZ_4610 | Up, Dn |
| 419 | 4978962 | T | G | 3.59%  | 5.08%  | SAZ_4616 | Ns | V71G  |                   |        |
| 420 | 5059134 | A | C | 7.01%  | 3.40%  | SAZ_4686 | Ns | V58G  |                   |        |
| 421 | 5065540 | G | C | 4.28%  | 5.73%  | SAZ_4693 | Ns | A6P   |                   |        |
| 422 | 5090774 | T | G | -      | 3.78%  | SAZ_4715 | Ns | T238P |                   |        |
| 423 | 5091855 | A | C | 3.09%  | 3.14%  | SAZ_4716 | Ns | V95G  |                   |        |
| 424 | 5092877 | C | G | -      | 6.67%  | SAZ_4718 | S  | P69P  |                   |        |
| 425 | 5092882 | C | G | 7.14%  | 12.71% | SAZ_4718 | Ns | A68P  |                   |        |
| 426 | 5092885 | T | G | 7.41%  | 7.46%  | SAZ_4718 | Ns | T67P  |                   |        |
| 427 | 5092897 | C | G | 4.88%  | -      | SAZ_4718 | Ns | A63P  |                   |        |
| 428 | 5097505 | - | G | 3.70%  | 4.87%  |          |    |       | SAZ_4724          | Dn     |
| 429 | 5099653 | C | A | 98.70% | 100%   | SAZ_4726 | Ns | P362T |                   |        |
| 430 | 5124410 | A | C | 3.53%  | 6.60%  |          |    |       | SAZ_4748,SAZ_4749 | Dn     |
| 431 | 5212135 | A | G | 6.54%  | 3.35%  |          |    |       | SAZ_4827,SAZ_4828 | Up, Dn |
| 432 | 5212141 | C | G | 5.74%  | 4.87%  |          |    |       | SAZ_4827,SAZ_4828 | Up, Dn |
| 433 | 5212147 | C | G | 4.76%  | 3.90%  |          |    |       | SAZ_4827,SAZ_4828 | Up, Dn |
| 434 | 5212151 | A | G | 7.92%  | 4.74%  |          |    |       | SAZ_4827,SAZ_4828 | Up, Dn |
| 435 | 5212157 | A | G | -      | 3.45%  |          |    |       | SAZ_4827,SAZ_4828 | Up, Dn |
| 436 | 5238716 | G | C | -      | 7.09%  |          |    |       | SAZ_4856,SAZ_4855 | Up, Dn |
| 437 | 5238720 | G | C | 4.49%  | 7.04%  |          |    |       | SAZ_4856,SAZ_4855 | Up, Dn |
| 438 | 5238730 | G | C | -      | 3.72%  |          |    |       | SAZ_4856,SAZ_4855 | Up, Dn |
| 439 | 5259624 | C | G | 11.65% | 12.64% | SAZ_4874 | S  | G310G |                   |        |
| 440 | 5261377 | C | G | 9.20%  | -      | SAZ_4876 | S  | P54P  |                   |        |
| 441 | 5261382 | C | G | 17.65% | 12.99% | SAZ_4876 | Ns | A53P  |                   |        |
| 442 | 5261637 | T | G | 5.04%  | 4.15%  |          |    |       | SAZ_4876          | Up     |
| 443 | 5293162 | C | G | -      | 6.11%  | SAZ_4904 | S  | G300G |                   |        |
| 444 | 5301993 | G | T | 3.06%  | -      | SAZ_4911 | Ns | G188W |                   |        |
| 445 | 5302002 | C | G | 14.16% | 10%    | SAZ_4911 | Ns | L191V |                   |        |
| 446 | 5319634 | T | G | 5.62%  | -      | SAZ_4931 | S  | P153P |                   |        |
| 447 | 5319639 | C | G | 4.66%  | 4.42%  | SAZ_4931 | Ns | A152P |                   |        |
| 448 | 5319643 | C | G | -      | 4.49%  | SAZ_4931 | S  | P150P |                   |        |

|     |         |        |   |        |        |                   |    |       |                   |        |
|-----|---------|--------|---|--------|--------|-------------------|----|-------|-------------------|--------|
| 449 | 5319648 | C      | G | 7.69%  | 7.95%  | SAZ_4931          | Ns | E149Q |                   |        |
| 450 | 5322272 | T      | C | 4.49%  | -      |                   |    |       | SAZ_4933,SAZ_4934 | Up, Dn |
| 451 | 5357670 | C      | T | 49.38% | 35.73% | SAZ_4975          | Ns | A235V |                   |        |
| 452 | 5373421 | C      | G | -      | 3.45%  |                   |    |       | SAZ_4989,SAZ_4990 | Up, Dn |
| 453 | 5373425 | C      | G | 3.59%  | 4.09%  |                   |    |       | SAZ_4989,SAZ_4990 | Up, Dn |
| 454 | 5399901 | A      | C | 4.17%  | -      | SAZ_5014          | Ns | V294G |                   |        |
| 455 | 5440405 | A      | C | 9.09%  | -      |                   |    |       | SAZ_5050,SAZ_5051 | Dn     |
| 456 | 5506175 | T      | G | -      | 9.20%  |                   |    |       | SAZ_5103          | Up     |
| 457 | 5506178 | T      | G | -      | 8.49%  |                   |    |       | SAZ_5103          | Up     |
| 458 | 5506187 | T      | G | 7.29%  | 7.22%  |                   |    |       | SAZ_5103          | Up     |
| 459 | 5506193 | C      | G | 6.09%  | 6.84%  |                   |    |       | SAZ_5103          | Up     |
| 460 | 5534991 | T      | C | 8.55%  | -      |                   |    |       | SAZ_5140          | Dn     |
| 461 | 5535010 | -      | C | 6.52%  | -      |                   |    |       | SAZ_5140,SAZ_5141 | IR     |
| 462 | 5535758 | -      | G | 9.55%  | 9.02%  |                   |    |       | SAZ_5141          | Dn     |
| 463 | 5535982 | G      | T | 8.46%  | 10.09% |                   |    |       | SAZ_5141,SAZ_5142 | IR     |
| 464 | 5562278 | T      | G | 98.33% | 99.17% |                   |    |       | SAZ_5166,SAZ_5167 | Dn     |
| 465 | 5562283 | T      | G | 100%   | 100%   |                   |    |       | SAZ_5166,SAZ_5167 | Dn     |
| 466 | 5562311 | C      | G | 99.41% | 99.46% |                   |    |       | SAZ_5166,SAZ_5167 | Dn     |
| 467 | 5562319 | C      | G | 98.56% | 99.56% |                   |    |       | SAZ_5166,SAZ_5167 | Dn     |
| 468 | 5584341 | C      | G | 9.09%  | 6.60%  | SAZ_5188          | Ns | A243P |                   |        |
| 469 | 5594749 | C      | T | -      | 16.08% | SAZ_5199          | Ns | E152K |                   |        |
| 470 | 5615628 | G      | A | 45.24% | 43.62% | SAZ_5219          | S  | L204L |                   |        |
| 471 | 5622375 | C      | A | 98.28% | -      |                   |    |       | SAZ_5225          | Up     |
| 472 | 5629416 | ACGAAA | - | 84.14% | 86.71% |                   |    |       | SAZ_5228          | Dn     |
| 473 | 5657433 | T      | C | 3.35%  | -      |                   |    |       | SAZ_5253,SAZ_5252 | Up, Dn |
| 474 | 5657517 | T      | C | -      | 4.26%  |                   |    |       | SAZ_5253          | Up     |
| 475 | 5657528 | G      | A | -      | 4.65%  |                   |    |       | SAZ_5253          | Up     |
| 476 | 5657552 | T      | A | 3.34%  | 6.84%  |                   |    |       | SAZ_5253          | Up     |
| 477 | 5657738 | A      | - | 4.38%  | 8.52%  |                   |    |       | SAZ_5253,SAZ_5254 | IR     |
| 478 | 5657742 | CGCC   | - | 4.32%  | 8.03%  |                   |    |       | SAZ_5253,SAZ_5254 | IR     |
| 479 | 5657772 | A      | C | 3.24%  | 6.96%  |                   |    |       | SAZ_5253,SAZ_5254 | IR     |
| 480 | 5657779 | A      | G | -      | 4.80%  |                   |    |       | SAZ_5253,SAZ_5254 | IR     |
| 481 | 5680873 | C      | G | 100%   | 100%   | SAZ_5280,SAZ_5281 | Ns | P68A  |                   |        |
| 482 | 5680891 | -      | T | 21.33% | 31.43% | SAZ_5280,SAZ_5281 | FS | A74fs |                   |        |
| 483 | 5689051 | A      | C | 3.19%  | -      | SAZ_5290          | Ns | V144G |                   |        |



|     |         |   |   |        |        |          |    |       |                   |        |
|-----|---------|---|---|--------|--------|----------|----|-------|-------------------|--------|
| 484 | 5777139 | C | G | 3.85%  | -      |          |    |       | SAZ_5392,SAZ_5393 | Up     |
| 485 | 5799103 | G | C | 8.99%  | 11.90% |          |    |       | SAZ_5416,SAZ_5415 | Up, Dn |
| 486 | 5799107 | G | C | 8%     | 6.80%  |          |    |       | SAZ_5416,SAZ_5415 | Up, Dn |
| 487 | 5799116 | G | C | 5.45%  | 6.23%  |          |    |       | SAZ_5416,SAZ_5415 | Up, Dn |
| 488 | 5804556 | G | C | 6.63%  | 6.25%  |          |    |       | SAZ_5422          | Up     |
| 489 | 5807226 | C | G | 9.09%  | 11.48% | SAZ_5423 | Ns | A123P |                   |        |
| 490 | 5837662 | C | G | 99.48% | 99.52% | SAZ_5452 | Ns | V327L |                   |        |
| 491 | 5840154 | A | C | -      | 6.76%  | SAZ_5454 | S  | P19P  |                   |        |
| 492 | 5866641 | G | T | -      | 100%   | SAZ_5477 | Ns | G73V  |                   |        |
| 493 | 5867925 | C | T | 4.86%  | -      | SAZ_5477 | Ns | P501L |                   |        |
| 494 | 5868749 | A | C | 4.98%  | 6.72%  | SAZ_5477 | Ns | T776P |                   |        |
| 495 | 5868752 | G | C | 4.03%  | 7.38%  | SAZ_5477 | Ns | A777P |                   |        |
| 496 | 5875236 | G | A | 5.95%  | -      | SAZ_5482 | Ns | V244M |                   |        |
| 497 | 5884232 | C | T | 98.92% | 100%   |          |    |       | SAZ_5488          | Dn     |
| 498 | 5884250 | C | T | 99.17% | 100%   |          |    |       | SAZ_5488          | Dn     |
| 499 | 5884256 | - | C | 17.65% | -      |          |    |       | SAZ_5488          | Dn     |
| 500 | 5884269 | - | G | 85%    | 80%    |          |    |       | SAZ_5488          | Dn     |
| 501 | 5884299 | A | C | 100%   | 98.39% |          |    |       | SAZ_5488          | Dn     |
| 502 | 5884318 | G | T | 97.75% | 99.09% |          |    |       | SAZ_5488          | Dn     |
| 503 | 5884335 | G | T | 97.44% | 99.31% |          |    |       | SAZ_5488          | Dn     |
| 504 | 5884353 | C | T | 99.19% | 98.67% |          |    |       | SAZ_5488          | Dn     |
| 505 | 5884375 | C | G | 100%   | 100%   |          |    |       | SAZ_5488          | Dn     |
| 506 | 5884394 | C | G | 100%   | 100%   |          |    |       | SAZ_5488          | Dn     |
| 507 | 5884436 | C | G | 100%   | -      |          |    |       | SAZ_5488          | Dn     |
| 508 | 5884455 | G | A | 98.75% | 100%   |          |    |       | SAZ_5488,SAZ_5489 | IR     |
| 509 | 5884466 | T | G | 100%   | 100%   |          |    |       | SAZ_5488,SAZ_5489 | IR     |
| 510 | 5884480 | A | T | 100%   | 100%   |          |    |       | SAZ_5488,SAZ_5489 | IR     |
| 511 | 5884498 | C | A | 100%   | 100%   |          |    |       | SAZ_5488,SAZ_5489 | IR     |
| 512 | 5914451 | G | C | 4.91%  | 9.59%  | SAZ_5514 | Ns | A329G |                   |        |
| 513 | 5914457 | G | C | 11.38% | 14.71% | SAZ_5514 | Ns | A327G |                   |        |
| 514 | 5938589 | C | G | -      | 3.24%  | SAZ_5548 | Ns | A18P  |                   |        |
| 515 | 5939271 | T | G | -      | 4.25%  | SAZ_5549 | Ns | Y142S |                   |        |
| 516 | 5969967 | C | - | 16.33% | 15.07% | SAZ_5588 | FS | H30fs |                   |        |
| 517 | 5974382 | C | G | -      | 4.02%  |          |    |       | SAZ_5592,SAZ_5593 | Dn     |
| 518 | 5978420 | C | G | -      | 3.13%  | SAZ_5600 | S  | P461P |                   |        |

|     |         |   |   |        |        |                   |    |       |                            |        |
|-----|---------|---|---|--------|--------|-------------------|----|-------|----------------------------|--------|
| 519 | 5995123 | A | G | 99.29% | 100%   | SAZ_5611          | Ns | D39G  |                            |        |
| 520 | 5995157 | A | G | 98.67% | 100%   | SAZ_5611          | S  | V50V  |                            |        |
| 521 | 5995192 | G | C | 99.60% | 100%   |                   |    |       | SAZ_5610,SAZ_5612,SAZ_5611 | Up, Dn |
| 522 | 6015955 | C | G | 6.71%  | 7.35%  | SAZ_5625          | Ns | R158P |                            |        |
| 523 | 6037597 | T | G | 7.80%  | -      |                   |    |       | SAZ_5640                   | Up     |
| 524 | 6037601 | C | G | 13.72% | 7.74%  |                   |    |       | SAZ_5640                   | Up     |
| 525 | 6040575 | T | G | -      | 5.15%  | SAZ_5643          | Ns | H296P |                            |        |
| 526 | 6075469 | A | C | 3.31%  | -      |                   |    |       | SAZ_5678,SAZ_5677          | Up, Dn |
| 527 | 6081969 | A | C | -      | 3.10%  |                   |    |       | SAZ_5683                   | Up     |
| 528 | 6096113 | C | G | -      | 3.35%  | SAZ_5699          | Ns | R20P  |                            |        |
| 529 | 6110223 | T | G | -      | 10%    | SAZ_5716          | Ns | T429P |                            |        |
| 530 | 6112240 | C | G | 15.79% | -      |                   |    |       | SAZ_5717,SAZ_5718          | Dn     |
| 531 | 6112254 | T | C | 98.90% | 100%   |                   |    |       | SAZ_5717,SAZ_5718          | Dn     |
| 532 | 6118655 | - | C | -      | 3.11%  |                   |    |       | SAZ_5723,SAZ_5722          | Up, Dn |
| 533 | 6118660 | - | C | 4.55%  | -      |                   |    |       | SAZ_5723,SAZ_5722          | Up, Dn |
| 534 | 6118664 | G | C | 9.44%  | 12.10% |                   |    |       | SAZ_5723,SAZ_5722          | Up, Dn |
| 535 | 6118669 | A | C | -      | 9.38%  |                   |    |       | SAZ_5723,SAZ_5722          | Up, Dn |
| 536 | 6118672 | G | C | 5.94%  | -      |                   |    |       | SAZ_5723,SAZ_5722          | Up, Dn |
| 537 | 6118683 | A | C | 5.68%  | -      |                   |    |       | SAZ_5723,SAZ_5722          | Up, Dn |
| 538 | 6118687 | G | C | 3.32%  | 6.67%  |                   |    |       | SAZ_5723,SAZ_5722          | Up, Dn |
| 539 | 6123831 | C | T | 3.37%  | -      | SAZ_5727          | S  | D5D   |                            |        |
| 540 | 6132075 | G | C | 3.14%  | 4.02%  | SAZ_5733          | S  | P297P |                            |        |
| 541 | 6132082 | G | C | 7.41%  | 5.38%  | SAZ_5733          | Ns | A300P |                            |        |
| 542 | 6132092 | G | C | 6.36%  | 3.93%  | SAZ_5733          | Ns | R303P |                            |        |
| 543 | 6181373 | T | G | 6.48%  | -      |                   |    |       | SAZ_5784,SAZ_5785          | Up, Dn |
| 544 | 6184040 | A | C | -      | 4.14%  | SAZ_5787          | Ns | Y89D  |                            |        |
| 545 | 6184794 | A | C | -      | 3.59%  | SAZ_5788          | Ns | V1G   |                            |        |
| 546 | 6197678 | C | G | 87.10% | 80.60% |                   |    |       | SAZ_5800,SAZ_5799          | Up, Dn |
| 547 | 6220753 | G | C | 6.62%  | 6.06%  | SAZ_5821          | Ns | A9P   |                            |        |
| 548 | 6224397 | A | C | 3.55%  | -      |                   |    |       | SAZ_5824                   | Dn     |
| 549 | 6225730 | G | C | 4.62%  | -      | SAZ_5826          | Ns | A188P |                            |        |
| 550 | 6225854 | G | C | -      | 4.43%  |                   |    |       | SAZ_5827,SAZ_5826          | Up, Dn |
| 551 | 6261737 | G | C | 100%   | 100%   | SAZ_5860,SAZ_5861 | Ns | D278E |                            |        |
| 552 | 6261741 | C | T | 98.53% | 99.30% | SAZ_5860,SAZ_5861 | Ns | R277H |                            |        |
| 553 | 6261754 | T | G | 100%   | 99.60% | SAZ_5861          | Ns | N273H |                            |        |

|     |         |   |                  |        |        |          |       |                   |                   |        |
|-----|---------|---|------------------|--------|--------|----------|-------|-------------------|-------------------|--------|
| 554 | 6261774 | C | T                | 100%   | 99.45% | SAZ_5861 | Ns    | G266E             |                   |        |
| 555 | 6261795 | T | A                | 98.26% | 98.88% | SAZ_5861 | Ns    | E259V             |                   |        |
| 556 | 6261815 | C | A                | 100%   | 99.50% | SAZ_5861 | S     | R252R             |                   |        |
| 557 | 6261825 | A | C                | 100%   | 100%   | SAZ_5861 | Ns    | L249R             |                   |        |
| 558 | 6261845 | A | G                | 100%   | 99.42% | SAZ_5861 | S     | P242P             |                   |        |
| 559 | 6261872 | C | T                | 100%   | 99.12% | SAZ_5861 | S     | E233E             |                   |        |
| 560 | 6289616 | C | G                | 100%   | 100%   | SAZ_5888 | Ns    | K313N             |                   |        |
| 561 | 6289634 | G | T                | 99.10% | 98.53% | SAZ_5888 | S     | A307A             |                   |        |
| 562 | 6289649 | G | T                | 99.59% | 100%   | SAZ_5888 | Ns    | D302E             |                   |        |
| 563 | 6289659 | G | T                | 99.13% | 100%   | SAZ_5888 | Ns    | P299Q             |                   |        |
| 564 | 6289684 | G | T                | 98.54% | 99.40% | SAZ_5888 | Ns    | Q291K             |                   |        |
| 565 | 6290534 | C | A                | 98.67% | 99.49% | SAZ_5888 | S     | R7R               |                   |        |
| 566 | 6290559 | G | C                | 100%   | 100%   |          |       |                   | SAZ_5888,SAZ_5889 | Up, Dn |
| 567 | 6315093 | C | G                | 3.74%  | 6.50%  | SAZ_5906 | Ns    | A139P             |                   |        |
| 568 | 6391533 | A | C                | 3.41%  | 4.08%  |          |       |                   | SAZ_5984,SAZ_5985 | Dn     |
| 569 | 6391537 | A | G                | 16.87% | 15%    |          |       |                   | SAZ_5984,SAZ_5985 | Dn     |
| 570 | 6391543 | C | G                | 29.14% | 24.36% |          |       |                   | SAZ_5984,SAZ_5985 | Dn     |
| 571 | 6414293 | C | G                | 4.35%  | 4.66%  |          |       |                   | SAZ_6006,SAZ_6007 | Up, Dn |
| 572 | 6418061 | T | G                | 3.02%  | -      | SAZ_6010 | Ns    | V285G             |                   |        |
| 573 | 6420580 | T | G                | 3.46%  | -      | SAZ_6013 | Ns    | V35G              |                   |        |
| 574 | 6429425 | G | C                | 4.80%  | 6.54%  | SAZ_6022 | Ns    | R397P             |                   |        |
| 575 | 6429431 | T | G                | -      | 3.26%  | SAZ_6022 | Ns    | V399G             |                   |        |
| 576 | 6434872 | T | G                | -      | 4.06%  | SAZ_6026 | Ns    | Y13S              |                   |        |
| 577 | 6475217 | T | G                | -      | 6.25%  | SAZ_6066 | Ns    | T41P              |                   |        |
| 578 | 6489349 | A | C                | 3.43%  | -      |          |       |                   | SAZ_6082,SAZ_6083 | Up, Dn |
| 579 | 6520942 | G | C                | 3.28%  | -      | SAZ_6109 | S     | G28G              |                   |        |
| 580 | 6525330 | C | G                | 5.90%  | 7.18%  |          |       |                   | SAZ_6112          | Up     |
| 581 | 6525337 | T | G                | 4.02%  | 8.54%  |          |       |                   | SAZ_6112          | Up     |
| 582 | 6525341 | C | G                | 10.61% | 13.78% |          |       |                   | SAZ_6112          | Up     |
| 583 | 6546812 | G | C                | 100%   | 100%   | SAZ_6132 | Ns    | G196A             |                   |        |
| 584 | 6557281 | A | G                | 98.95% | 100%   | SAZ_6140 | Ns    | S971G             |                   |        |
| 585 | 6561453 | T | C                | 6.12%  | -      | SAZ_6141 | S     | L947L             |                   |        |
| 586 | 6561457 | T | -                | 7.36%  | -      | SAZ_6141 | FS    | V948fs            |                   |        |
| 587 | 6561463 | - | TGCTGGTGGCTGGTGG | 17.39% | 15.79% | SAZ_6141 | nonFS | S950delinsSAGAGAG |                   |        |
| 588 | 6564716 | T | C                | 98.97% | 100%   | SAZ_6141 | S     | I2034I            |                   |        |

|     |         |    |      |        |        |          |    |       |                   |        |
|-----|---------|----|------|--------|--------|----------|----|-------|-------------------|--------|
| 589 | 6623163 | G  | C    | 13.27% | 12.28% |          |    |       | SAZ_6153,SAZ_6154 | Dn     |
| 590 | 6629233 | G  | C    | 23.81% | -      |          |    |       | SAZ_6158,SAZ_6159 | Dn     |
| 591 | 6629237 | G  | C    | 13.14% | 14.60% |          |    |       | SAZ_6158,SAZ_6159 | Dn     |
| 592 | 6629240 | G  | C    | 5.92%  | 5.41%  |          |    |       | SAZ_6158,SAZ_6159 | Dn     |
| 593 | 6634197 | G  | C    | 100%   | 100%   |          |    |       | SAZ_6165,SAZ_6164 | Up, Dn |
| 594 | 6635816 | C  | T    | 3.39%  | 4%     | SAZ_6165 | Ns | A456V |                   |        |
| 595 | 6637563 | T  | G    | -      | 3.63%  | SAZ_6166 | Ns | Y126S |                   |        |
| 596 | 6639790 | C  | -    | 3.11%  | 4.17%  |          |    |       | SAZ_6168,SAZ_6169 | Up     |
| 597 | 6669166 | T  | G    | -      | 4.18%  | SAZ_6197 | Ns | T59P  |                   |        |
| 598 | 6674070 | -  | GG   | 11.70% | -      | SAZ_6202 | FS | T88fs |                   |        |
| 599 | 6674330 | AT | -    | 92.86% | -      | SAZ_6202 | FS |       |                   |        |
| 600 | 6729865 | C  | G    | 5.46%  | 3.83%  |          |    |       | SAZ_6247,SAZ_6248 | Up, Dn |
| 601 | 6729870 | C  | G    | 3.89%  | -      |          |    |       | SAZ_6247,SAZ_6248 | Up, Dn |
| 602 | 6731257 | C  | G    | -      | 5.49%  |          |    |       | SAZ_6248,SAZ_6249 | Up, Dn |
| 603 | 6731261 | C  | G    | 5.33%  | 7.95%  |          |    |       | SAZ_6248,SAZ_6249 | Up, Dn |
| 604 | 6746269 | C  | G    | 11.74% | 11.71% |          |    |       | SAZ_6262,SAZ_6261 | Up, Dn |
| 605 | 6799850 | A  | C    | 3.11%  | -      |          |    |       | SAZ_6305,SAZ_6304 | Up, Dn |
| 606 | 6818984 | A  | C    | 4.47%  | -      | SAZ_6320 | Ns | T655P |                   |        |
| 607 | 6818993 | A  | C    | 4.40%  | -      | SAZ_6320 | Ns | T658P |                   |        |
| 608 | 6842861 | C  | G    | 100%   | 100%   |          |    |       | SAZ_6341,SAZ_6342 | IR     |
| 609 | 6870050 | C  | G    | 100%   | 99.25% | SAZ_6371 | Ns | P809A |                   |        |
| 610 | 6870096 | C  | A    | 100%   | 99.30% | SAZ_6371 | Ns | A824E |                   |        |
| 611 | 6870130 | G  | C    | 100%   | 100%   | SAZ_6371 | S  | A835A |                   |        |
| 612 | 6897161 | C  | G    | -      | 3.54%  |          |    |       | SAZ_6396,SAZ_6395 | Up, Dn |
| 613 | 6915646 | A  | C    | 8.45%  | -      |          |    |       | SAZ_6413,SAZ_6414 | Dn     |
| 614 | 6915658 | A  | C    | 16.46% | -      |          |    |       | SAZ_6413,SAZ_6414 | Dn     |
| 615 | 6916361 | T  | G    | -      | 3.14%  | SAZ_6414 | Ns | T211P |                   |        |
| 616 | 6916929 | C  | G    | 4.86%  | -      | SAZ_6414 | S  | P21P  |                   |        |
| 617 | 6916935 | C  | G    | 4.83%  | 5.56%  | SAZ_6414 | S  | P19P  |                   |        |
| 618 | 6939194 | A  | C    | -      | 3.67%  | SAZ_6435 | Ns | T183P |                   |        |
| 619 | 6972471 | A  | C    | -      | 5.66%  |          |    |       | SAZ_6465,SAZ_6466 | Dn     |
| 620 | 6986067 | A  | G    | 3.66%  | -      | SAZ_6481 | Ns | L270P |                   |        |
| 621 | 7006692 | C  | T    | 11.41% | 6.54%  |          |    |       | SAZ_6501          | Dn     |
| 622 | 7006694 | -  | TCTT | 3.45%  | -      |          |    |       | SAZ_6501          | Dn     |
| 623 | 7006695 | GC | -    | -      | 3.20%  |          |    |       | SAZ_6501          | Dn     |

|     |         |        |   |        |        |          |          |        |                   |    |
|-----|---------|--------|---|--------|--------|----------|----------|--------|-------------------|----|
| 624 | 7006744 | C      | T | 4.55%  | -      |          |          |        | SAZ_6501          | Dn |
| 625 | 7006747 | A      | - | 10.62% | 7.04%  |          |          |        | SAZ_6501          | Dn |
| 626 | 7006752 | C      | - | 9.88%  | 7.59%  |          |          |        | SAZ_6501          | Dn |
| 627 | 7008653 | T      | C | 100%   | 100%   |          |          |        | SAZ_6503,SAZ_6504 | Dn |
| 628 | 7027276 | G      | T | 99.24% | 98.90% |          |          |        | SAZ_6517,SAZ_6518 | IR |
| 629 | 7027400 | T      | C | 3.56%  | 3.12%  |          |          |        | SAZ_6517,SAZ_6518 | IR |
| 630 | 7027401 | G      | A | 3.34%  | -      |          |          |        | SAZ_6517,SAZ_6518 | IR |
| 631 | 7027413 | A      | G | 10.65% | 3.80%  |          |          |        | SAZ_6517,SAZ_6518 | IR |
| 632 | 7027414 | C      | T | 4.99%  | 3.02%  |          |          |        | SAZ_6517,SAZ_6518 | IR |
| 633 | 7027437 | G      | C | 6.58%  | 5.45%  |          |          |        | SAZ_6517,SAZ_6518 | IR |
| 634 | 7027438 | T      | A | -      | 7.13%  |          |          |        | SAZ_6517,SAZ_6518 | IR |
| 635 | 7027446 | G      | A | 14.23% | 13.23% |          |          |        | SAZ_6517,SAZ_6518 | IR |
| 636 | 7027448 | G      | C | 17.20% | 19.29% |          |          |        | SAZ_6517,SAZ_6518 | IR |
| 637 | 7027477 | A      | G | 9.78%  | 8.42%  |          |          |        | SAZ_6517,SAZ_6518 | IR |
| 638 | 7027535 | C      | T | 47.40% | 40.62% |          |          |        | SAZ_6517,SAZ_6518 | IR |
| 639 | 7027602 | -      | C | 29%    | 37.78% |          |          |        | SAZ_6517,SAZ_6518 | IR |
| 640 | 7033347 | ACGAAA | - | 90.86% | 88.74% |          |          |        | SAZ_6519          | Up |
| 641 | 7033414 | T      | A | 100%   | 99.55% |          |          |        | SAZ_6519          | Up |
| 642 | 7038295 | A      | G | -      | 16.42% |          |          |        | SAZ_6523          | Dn |
| 643 | 7040505 | G      | C | -      | 8.24%  | SAZ_6525 | Ns       | A282P  |                   |    |
| 644 | 7041774 | C      | G | 4.07%  | 3.61%  |          |          |        | SAZ_6526          | Dn |
| 645 | 7041779 | C      | G | 3.35%  | -      |          |          |        | SAZ_6526          | Dn |
| 646 | 7041787 | T      | G | 7.33%  | 8.04%  |          |          |        | SAZ_6526          | Dn |
| 647 | 7087958 | A      | C | -      | 4.17%  | SAZ_6560 | Ns       | T786P  |                   |    |
| 648 | 7102722 | A      | G | -      | 4.70%  | SAZ_6565 | Ns       | L23P   |                   |    |
| 649 | 7171176 | C      | G | 4.91%  | -      | SAZ_6619 | Ns       | A35P   |                   |    |
| 650 | 7175172 | A      | C | 3.30%  | -      | SAZ_6624 | Ns       | V210G  |                   |    |
| 651 | 7203843 | -      | C | -      | 4.14%  | SAZ_6654 | FS       | D241fs |                   |    |
| 652 | 7217853 | C      | A | 20.90% | 15.22% | SAZ_6666 | S        | T188T  |                   |    |
| 653 | 7234060 | C      | T | -      | 5.03%  | SAZ_6676 | S        | A79A   |                   |    |
| 654 | 7246834 | T      | G | -      | 3.03%  | SAZ_6691 | Ns       | L78V   |                   |    |
| 655 | 7250449 | T      | G | 90%    | -      | SAZ_6695 | Ns       | S328A  |                   |    |
| 656 | 7250452 | -      | A | 39.22% | -      | SAZ_6695 | FS       | A329fs |                   |    |
| 657 | 7282614 | A      | C | 3.63%  | 4.88%  | SAZ_6723 | S        | P190P  |                   |    |
| 658 | 7299628 | C      | T | 3.04%  | -      | SAZ_6739 | StopGain | W210*  |                   |    |

|     |         |   |   |        |        |                   |    |       |                   |        |
|-----|---------|---|---|--------|--------|-------------------|----|-------|-------------------|--------|
| 659 | 7325399 | A | C | 3.60%  | -      | SAZ_6760          | S  | G396G |                   |        |
| 660 | 7327972 | T | G | -      | 6.84%  | SAZ_6762          | Ns | L78R  |                   |        |
| 661 | 7365869 | C | G | 5.64%  | 3.92%  | SAZ_6806          | Ns | R27G  |                   |        |
| 662 | 7370150 | C | G | 10.46% | 6.36%  | SAZ_6808          | Ns | R45P  |                   |        |
| 663 | 7373400 | G | A | 3.29%  | -      |                   |    |       | SAZ_6812,SAZ_6813 | Up     |
| 664 | 7378839 | A | G | 3.83%  | 4.73%  | SAZ_6817          | S  | P8P   |                   |        |
| 665 | 7383349 | T | G | 13.40% | -      |                   |    |       | SAZ_6824,SAZ_6823 | Up, Dn |
| 666 | 7423470 | C | T | 3.94%  | -      | SAZ_6873          | Ns | R43C  |                   |        |
| 667 | 7431270 | A | G | 6.52%  | 11.76% | SAZ_6880          | S  | D97D  |                   |        |
| 668 | 7431280 | A | G | 5.80%  | 11.65% | SAZ_6880          | Ns | V94A  |                   |        |
| 669 | 7451950 | A | C | 4.63%  | 4.96%  |                   |    |       | SAZ_6907          | Up     |
| 670 | 7455276 | C | A | 98.53% | 99.09% | SAZ_6911          | S  | T27T  |                   |        |
| 671 | 7455315 | T | C | 98.72% | 100%   | SAZ_6911          | S  | G40G  |                   |        |
| 672 | 7455332 | C | A | 100%   | 100%   | SAZ_6911          | Ns | A46D  |                   |        |
| 673 | 7455353 | T | C | 98.96% | 100%   | SAZ_6911          | Ns | V53A  |                   |        |
| 674 | 7455857 | C | G | 100%   | 100%   | SAZ_6911          | Ns | S221C |                   |        |
| 675 | 7455877 | A | G | 100%   | 100%   | SAZ_6911          | Ns | S228G |                   |        |
| 676 | 7455899 | A | G | 100%   | 99.01% | SAZ_6911          | Ns | H235R |                   |        |
| 677 | 7455919 | G | C | 100%   | 100%   | SAZ_6911          | Ns | A242P |                   |        |
| 678 | 7455937 | C | A | 100%   | 99.28% | SAZ_6911          | S  | R248R |                   |        |
| 679 | 7455950 | G | A | 100%   | 100%   | SAZ_6911          | Ns | G252D |                   |        |
| 680 | 7456417 | C | T | -      | 7.01%  | SAZ_6911,SAZ_6912 | Ns | A352T |                   |        |
| 681 | 7468839 | T | G | 3.02%  | -      | SAZ_6927          | Ns | T189P |                   |        |
| 682 | 7491151 | T | G | 5.73%  | -      | SAZ_6952          | Ns | T63P  |                   |        |
| 683 | 7492952 | C | G | 3.65%  | -      | SAZ_6954          | S  | P446P |                   |        |
| 684 | 7512773 | C | T | -      | 3.95%  | SAZ_6979          | S  | V337V |                   |        |
| 685 | 7564186 | T | G | -      | 3.52%  | SAZ_7036          | S  | A33A  |                   |        |
| 686 | 7585440 | T | G | 3.25%  | -      | SAZ_7056          | Ns | T158P |                   |        |
| 687 | 7587102 | A | C | -      | 3.12%  |                   |    |       | SAZ_7057,SAZ_7058 | Up     |
| 688 | 7598508 | C | T | 4%     | -      | SAZ_7068          | S  | G46G  |                   |        |
| 689 | 7633377 | A | G | -      | 100%   |                   |    |       | SAZ_7099          | Up     |
| 690 | 7653512 | C | G | 100%   | 99.48% |                   |    |       | SAZ_7117          | Up     |
| 691 | 7653524 | C | A | 99.24% | 99.45% |                   |    |       | SAZ_7117          | Up     |
| 692 | 7653544 | C | T | 99.59% | 98.29% |                   |    |       | SAZ_7117          | Up     |
| 693 | 7653565 | G | T | 97.54% | 97.78% |                   |    |       | SAZ_7117,SAZ_7118 | Up     |

|     |         |   |      |        |        |          |    |       |                   |        |
|-----|---------|---|------|--------|--------|----------|----|-------|-------------------|--------|
| 694 | 7653569 | G | T    | 99.19% | 97.85% |          |    |       | SAZ_7117,SAZ_7118 | Up     |
| 695 | 7653588 | A | C    | 98.55% | 97.98% |          |    |       | SAZ_7117,SAZ_7118 | Up     |
| 696 | 7653595 | A | C    | 100%   | 98.90% |          |    |       | SAZ_7117,SAZ_7118 | Up     |
| 697 | 7653606 | T | C    | 100%   | 100%   |          |    |       | SAZ_7117,SAZ_7118 | Up     |
| 698 | 7653615 | G | C    | 98.28% | -      |          |    |       | SAZ_7117,SAZ_7118 | Up     |
| 699 | 7653625 | T | C    | 98.67% | 98.08% |          |    |       | SAZ_7117,SAZ_7118 | Up     |
| 700 | 7653632 | A | C    | 98.59% | 100%   |          |    |       | SAZ_7117,SAZ_7118 | Up     |
| 701 | 7653636 | C | T    | 100%   | 40%    |          |    |       | SAZ_7117,SAZ_7118 | Up     |
| 702 | 7653640 | C | A    | 98.33% | -      |          |    |       | SAZ_7117,SAZ_7118 | Up     |
| 703 | 7653660 | T | G    | 100%   | -      |          |    |       | SAZ_7117,SAZ_7118 | Up     |
| 704 | 7653664 | C | G    | 100%   | -      |          |    |       | SAZ_7117,SAZ_7118 | Up     |
| 705 | 7653691 | G | T    | 100%   | 98.18% |          |    |       | SAZ_7117,SAZ_7118 | Up     |
| 706 | 7653717 | G | T    | 100%   | 98.53% |          |    |       | SAZ_7117,SAZ_7118 | Up     |
| 707 | 7653722 | G | T    | 100%   | 95.38% |          |    |       | SAZ_7117,SAZ_7118 | Up     |
| 708 | 7653748 | C | A    | 100%   | 98.65% |          |    |       | SAZ_7117,SAZ_7118 | Up     |
| 709 | 7653768 | T | G    | 98.44% | 100%   |          |    |       | SAZ_7118          | Up     |
| 710 | 7653781 | A | G    | 98.53% | 100%   |          |    |       | SAZ_7118          | Up     |
| 711 | 7662348 | T | G    | -      | 3.43%  | SAZ_7125 | S  | G433G |                   |        |
| 712 | 7670663 | A | C    | -      | 5.10%  | SAZ_7134 | Ns | D314A |                   |        |
| 713 | 7698581 | C | G    | 3.21%  | -      | SAZ_7162 | Ns | A29P  |                   |        |
| 714 | 7733276 | - | CCCC | 18.75% | -      |          |    |       | SAZ_7192          | Up     |
| 715 | 7733445 | T | G    | 3.98%  | -      |          |    |       | SAZ_7193          | Dn     |
| 716 | 7757697 | G | A    | 3.65%  | -      | SAZ_7219 | Ns | E506K |                   |        |
| 717 | 7815056 | G | C    | 8.88%  | 10.61% |          |    |       | SAZ_7268,SAZ_7267 | Up, Dn |
| 718 | 7815060 | G | C    | 7.65%  | 9.09%  |          |    |       | SAZ_7268,SAZ_7267 | Up, Dn |
| 719 | 7815065 | G | C    | 4.23%  | 6.25%  |          |    |       | SAZ_7268,SAZ_7267 | Up, Dn |
| 720 | 7815068 | G | C    | -      | 4.73%  |          |    |       | SAZ_7268,SAZ_7267 | Up, Dn |
| 721 | 7815740 | A | C    | -      | 3.52%  | SAZ_7268 | Ns | I200L |                   |        |
| 722 | 7819445 | C | -    | 3.03%  | -      |          |    |       | SAZ_7272,SAZ_7271 | Up, Dn |
| 723 | 7821979 | A | C    | 3.15%  | -      |          |    |       | SAZ_7274,SAZ_7273 | Up, Dn |
| 724 | 7821982 | A | C    | 3.59%  | -      |          |    |       | SAZ_7274,SAZ_7273 | Up, Dn |
| 725 | 7823055 | G | C    | 17.78% | 18.07% | SAZ_7275 | Ns | A40P  |                   |        |
| 726 | 7823058 | G | C    | 6.77%  | 12.24% | SAZ_7275 | Ns | A41P  |                   |        |
| 727 | 7848627 | C | G    | 5.67%  | 6.01%  | SAZ_7297 | Ns | A46P  |                   |        |
| 728 | 7862845 | A | G    | 100%   | 100%   | SAZ_7317 | S  | S142S |                   |        |

|     |         |   |   |        |        |          |    |       |                            |        |
|-----|---------|---|---|--------|--------|----------|----|-------|----------------------------|--------|
| 729 | 7951597 | A | C | 5.51%  | 9.52%  |          |    |       | SAZ_7400                   | Up     |
| 730 | 7964488 | A | C | -      | 3.14%  | SAZ_7413 | Ns | T191P |                            |        |
| 731 | 7973902 | G | A | -      | 4.83%  | SAZ_7420 | S  | A238A |                            |        |
| 732 | 8009485 | C | G | 44.97% | 40.62% | SAZ_7452 | Ns | P275R |                            |        |
| 733 | 8032717 | T | G | -      | 3.47%  | SAZ_7475 | Ns | V144G |                            |        |
| 734 | 8038102 | T | G | -      | 3.08%  |          |    |       | SAZ_7480,SAZ_7479          | Up, Dn |
| 735 | 8068333 | G | C | 11.84% | -      | SAZ_7509 | Ns | G10R  |                            |        |
| 736 | 8094631 | A | G | 7.88%  | 6.80%  |          |    |       | SAZ_7531,SAZ_7532          | Up, Dn |
| 737 | 8209341 | G | A | 9.55%  | 13.07% | SAZ_7637 | S  | L57L  |                            |        |
| 738 | 8262875 | T | G | 5.66%  | -      | SAZ_7687 | Ns | H430P |                            |        |
| 739 | 8288039 | C | G | 5.19%  | -      | SAZ_7711 | Ns | A11P  |                            |        |
| 740 | 8288043 | C | G | 6.92%  | -      | SAZ_7711 | S  | P9P   |                            |        |
| 741 | 8331307 | A | C | -      | 4.23%  | SAZ_7753 | Ns | H24P  |                            |        |
| 742 | 8332943 | G | C | 9.60%  | -      | SAZ_7754 | Ns | A189P |                            |        |
| 743 | 8332947 | G | C | -      | 7.34%  | SAZ_7754 | Ns | R190P |                            |        |
| 744 | 8332950 | A | C | 5.07%  | -      | SAZ_7754 | Ns | H191P |                            |        |
| 745 | 8332953 | G | C | 6.83%  | 7.75%  | SAZ_7754 | Ns | R192P |                            |        |
| 746 | 8344595 | G | C | 7.45%  | 6.67%  | SAZ_7768 | Ns | A294P |                            |        |
| 747 | 8349398 | C | G | 3.59%  | -      | SAZ_7774 | S  | P71P  |                            |        |
| 748 | 8381139 | A | G | 100%   | -      |          |    |       | SAZ_7805,SAZ_7806,SAZ_7807 | Up     |
| 749 | 8381144 | A | C | 100%   | -      | SAZ_7807 | Ns | M1L   |                            |        |
| 750 | 8381154 | G | T | 100%   | -      | SAZ_7807 | Ns | R4L   |                            |        |
| 751 | 8381158 | G | C | 100%   | 100%   | SAZ_7807 | S  | A5A   |                            |        |
| 752 | 8381167 | G | A | 96.81% | 100%   | SAZ_7807 | S  | E8E   |                            |        |
| 753 | 8381184 | G | T | 100%   | 98.73% | SAZ_7807 | Ns | R14L  |                            |        |
| 754 | 8381200 | C | T | 98.36% | 100%   | SAZ_7807 | S  | G19G  |                            |        |
| 755 | 8386430 | G | C | -      | 4.61%  |          |    |       | SAZ_7811,SAZ_7812          | Up, Dn |
| 756 | 8391463 | C | G | 13.09% | 14.39% |          |    |       | SAZ_7815,SAZ_7817,SAZ_7816 | Up, Dn |
| 757 | 8391467 | C | G | 20.86% | 24.51% |          |    |       | SAZ_7815,SAZ_7817,SAZ_7816 | Up, Dn |
| 758 | 8407393 | G | C | 10.32% | -      | SAZ_7833 | Ns | R149P |                            |        |
| 759 | 8407446 | G | C | -      | 4.96%  | SAZ_7833 | Ns | A167P |                            |        |
| 760 | 8414831 | T | G | 4.32%  | -      | SAZ_7840 | Ns | T43P  |                            |        |
| 761 | 8415233 | T | G | -      | 3.32%  |          |    |       | SAZ_7840,SAZ_7841          | Up     |
| 762 | 8496014 | C | G | 5.69%  | -      |          |    |       | SAZ_7920,SAZ_7921          | Up, Dn |
| 763 | 8570218 | C | G | 6.57%  | 6.47%  | SAZ_8016 | Ns | A321G |                            |        |



|     |         |   |           |        |        |                   |    |        |                            |        |
|-----|---------|---|-----------|--------|--------|-------------------|----|--------|----------------------------|--------|
| 764 | 8570439 | - | C         | 94.64% | -      |                   |    |        | SAZ_8016,SAZ_8017          | Dn     |
| 765 | 8570455 | A | G         | 98.61% | 100%   |                   |    |        | SAZ_8016,SAZ_8017          | Dn     |
| 766 | 8570471 | C | A         | 98.63% | 100%   |                   |    |        | SAZ_8016,SAZ_8017          | Dn     |
| 767 | 8570487 | C | G         | 100%   | 100%   |                   |    |        | SAZ_8016,SAZ_8017          | Dn     |
| 768 | 8570507 | A | G         | 100%   | -      |                   |    |        | SAZ_8016,SAZ_8017          | Dn     |
| 769 | 8570520 | A | G         | 98.08% | -      |                   |    |        | SAZ_8016,SAZ_8017          | Dn     |
| 770 | 8570668 | G | T         | 100%   | -      | SAZ_8017          | Ns | A237E  |                            |        |
| 771 | 8570686 | C | A         | 99.03% | 100%   | SAZ_8017          | Ns | R231L  |                            |        |
| 772 | 8574295 | T | G         | -      | 3.68%  |                   |    |        | SAZ_8020                   | Dn     |
| 773 | 8684385 | A | C         | -      | 3.03%  | SAZ_8129          | Ns | H185P  |                            |        |
| 774 | 8686047 | C | G         | 4.29%  | -      | SAZ_8131          | Ns | R365P  |                            |        |
| 775 | 8694246 | A | C         | -      | 3.98%  | SAZ_8139          | Ns | T118P  |                            |        |
| 776 | 8697396 | - | CC        | 17.61% | 8.53%  |                   |    |        | SAZ_8142,SAZ_8143          | Dn     |
| 777 | 8697398 | - | TCCC      | 17.01% | 8.27%  |                   |    |        | SAZ_8142,SAZ_8143          | Dn     |
| 778 | 8697402 | G | C         | 8.82%  | 7.96%  |                   |    |        | SAZ_8142,SAZ_8143          | Dn     |
| 779 | 8697405 | G | C         | 10.75% | 10.38% |                   |    |        | SAZ_8142,SAZ_8143          | Dn     |
| 780 | 8697412 | - | CGGCGGGCA | 4.91%  | 5.59%  |                   |    |        | SAZ_8142,SAZ_8143          | Dn     |
| 781 | 8697413 | - | GG        | 8.53%  | 11.11% |                   |    |        | SAZ_8142,SAZ_8143          | Dn     |
| 782 | 8723327 | C | G         | -      | 6.11%  | SAZ_8166          | S  | P48P   |                            |        |
| 783 | 8743120 | G | C         | 13.51% | -      |                   |    |        | SAZ_8183,SAZ_8181,SAZ_8182 | Up, Dn |
| 784 | 8763000 | T | G         | -      | 3.12%  | SAZ_8203,SAZ_8204 | Ns | H4P    |                            |        |
| 785 | 8772597 | G | C         | 5.03%  | -      |                   |    |        | SAZ_8212,SAZ_8213          | Up     |
| 786 | 8789182 | T | G         | 4.12%  | -      | SAZ_8231          | Ns | T305P  |                            |        |
| 787 | 8821880 | G | T         | 98.29% | 100%   | SAZ_8261          | Ns | G78V   |                            |        |
| 788 | 8821915 | G | C         | 97.92% | 100%   | SAZ_8261          | Ns | V90L   |                            |        |
| 789 | 8821927 | G | T         | 100%   | 100%   | SAZ_8261          | Ns | D94Y   |                            |        |
| 790 | 8830881 | A | C         | 3.27%  | -      | SAZ_8270          | Ns | V371G  |                            |        |
| 791 | 8856149 | G | A         | -      | 8.60%  | SAZ_8294          | Ns | E463K  |                            |        |
| 792 | 8878541 | G | C         | 44.07% | 31.41% | SAZ_8320          | S  | S422S  |                            |        |
| 793 | 8880867 | C | A         | 100%   | -      | SAZ_8322          | Ns | R203M  |                            |        |
| 794 | 8972523 | T | G         | -      | 3.68%  | SAZ_8414          | Ns | V317G  |                            |        |
| 795 | 9038879 | T | G         | -      | 3.17%  | SAZ_8482          | Ns | E1987A |                            |        |
| 796 | 9061489 | G | C         | 14.72% | 19%    | SAZ_8496          | Ns | A220G  |                            |        |
| 797 | 9061492 | A | C         | 6.71%  | 9.30%  | SAZ_8496          | Ns | V219G  |                            |        |
| 798 | 9061495 | G | C         | 9.25%  | 11.70% | SAZ_8496          | Ns | A218G  |                            |        |

|     |         |     |           |        |        |          |       |                 |                   |        |
|-----|---------|-----|-----------|--------|--------|----------|-------|-----------------|-------------------|--------|
| 799 | 9073008 | G   | C         | -      | 7.69%  |          |       |                 | SAZ_8506,SAZ_8507 | Dn     |
| 800 | 9089878 | T   | G         | -      | 3.21%  | SAZ_8527 | Ns    | D230A           |                   |        |
| 801 | 9096894 | A   | G         | 32.80% | 31%    | SAZ_8534 | S     | N247N           |                   |        |
| 802 | 9136001 | G   | T         | 99.18% | 100%   | SAZ_8575 | Ns    | T226N           |                   |        |
| 803 | 9136040 | C   | A         | 99.38% | 99.24% | SAZ_8575 | Ns    | G213V           |                   |        |
| 804 | 9155131 | T   | G         | 6.21%  | 5.83%  |          |       |                 | SAZ_8591,SAZ_8590 | Up, Dn |
| 805 | 9176767 | A   | C         | 3.11%  | -      | SAZ_8616 | Ns    | T364P           |                   |        |
| 806 | 9213077 | A   | C         | 3.06%  | -      | SAZ_8649 | Ns    | T10P            |                   |        |
| 807 | 9246026 | G   | A         | 100%   | -      | SAZ_8654 | S     | Q749Q           |                   |        |
| 808 | 9260196 | CCC | -         | 38%    | -      | SAZ_8655 | nonFS | 3676_3677del    |                   |        |
| 809 | 9267137 | G   | C         | 9.62%  | -      |          |       |                 | SAZ_8657,SAZ_8656 | Up, Dn |
| 810 | 9267142 | G   | C         | 6.38%  | -      |          |       |                 | SAZ_8657,SAZ_8656 | Up, Dn |
| 811 | 9274035 | G   | C         | 7.44%  | -      | SAZ_8662 | S     | P432P           |                   |        |
| 812 | 9274051 | G   | C         | 8.77%  | -      | SAZ_8662 | Ns    | A438P           |                   |        |
| 813 | 9297984 | C   | G         | 100%   | 100%   | SAZ_8665 | Ns    | L996V           |                   |        |
| 814 | 9299495 | A   | G         | 98.86% | 100%   | SAZ_8665 | S     | R1499R          |                   |        |
| 815 | 9302503 | A   | C         | 5.41%  | 6.38%  | SAZ_8666 | S     | T568T           |                   |        |
| 816 | 9302512 | C   | T         | 8.21%  | 8.87%  | SAZ_8666 | S     | V571V           |                   |        |
| 817 | 9302521 | T   | G         | 9.56%  | 14.08% | SAZ_8666 | S     | G574G           |                   |        |
| 818 | 9302725 | C   | T         | 28.36% | 35.43% | SAZ_8666 | S     | D642D           |                   |        |
| 819 | 9302842 | C   | T         | 18.99% | 18.62% | SAZ_8666 | S     | D681D           |                   |        |
| 820 | 9321838 | T   | C         | 100%   | 100%   | SAZ_8671 | S     | R781R           |                   |        |
| 821 | 9321889 | G   | C         | 100%   | 100%   | SAZ_8671 | S     | G798G           |                   |        |
| 822 | 9322021 | T   | G         | 100%   | 98.31% | SAZ_8671 | Ns    | F842L           |                   |        |
| 823 | 9322552 | C   | T         | 98.69% | 99.35% | SAZ_8671 | S     | G1019G          |                   |        |
| 824 | 9322564 | C   | T         | 100%   | 100%   | SAZ_8671 | S     | N1023N          |                   |        |
| 825 | 9353554 | A   | G         | 100%   | 100%   | SAZ_8691 | S     | A790A           |                   |        |
| 826 | 9398102 | -   | G         | 32.94% | 33.85% |          |       |                 | SAZ_8729,SAZ_8730 | Up, Dn |
| 827 | 9398881 | G   | T         | 3.27%  | -      |          |       |                 | SAZ_8730,SAZ_8731 | IR     |
| 828 | 9402235 | A   | C         | 3.65%  | -      |          |       |                 | SAZ_8734,SAZ_8735 | Up     |
| 829 | 9405784 | T   | G         | 3.32%  | -      | SAZ_8738 | Ns    | H481P           |                   |        |
| 830 | 9407177 | C   | G         | 5.19%  | -      | SAZ_8738 | Ns    | A17P            |                   |        |
| 831 | 9409320 | C   | A         | 100%   | -      | SAZ_8741 | Ns    | G397V           |                   |        |
| 832 | 9421627 | G   | -         | 14.02% | 17.33% |          |       |                 | SAZ_8748,SAZ_8749 | Up, Dn |
| 833 | 9470272 | -   | GTGGGCATG | 21.15% | -      | SAZ_8790 | nonFS | E1384delinsEVGM |                   |        |

|            |         |   |   |        |        |          |    |        |          |    |
|------------|---------|---|---|--------|--------|----------|----|--------|----------|----|
| <b>834</b> | 9563086 | G | A | 10.47% | -      |          |    |        | SAZ_8883 | Dn |
| <b>835</b> | 9639547 | G | C | 12.07% | 17.95% | SAZ_8963 | S  | P1766P |          |    |
| <b>836</b> | 9639550 | A | C | 19.79% | 10.77% | SAZ_8963 | S  | P1767P |          |    |
| <b>837</b> | 9639554 | T | C | 6.25%  | -      | SAZ_8963 | Ns | S1769P |          |    |
| <b>838</b> | 9639566 | G | C | 5.22%  | -      | SAZ_8963 | Ns | A1773P |          |    |

\*Abbreviations: Ref: genome reference sequence; Ns: non-synonymous mutation; S: synonymous mutation; FS: frame shift mutation; Up: Distances within 300 bp upstream of the coding regions of genes; Dn: Distances within 300 bp downstream of the coding regions of genes; IR: intergenic region, distance beyond 300 bp upstream or downstream of the coding regions of the nearest genes.

**Table S5 Genes associated with PL yield**

| Gene     | low-specific | high-specific | COG | Molecular function                      |
|----------|--------------|---------------|-----|-----------------------------------------|
| SAZ_0249 |              | Y72S          |     | hypothetical protein                    |
| SAZ_0323 | H259P        |               | [R] | alpha/beta hydrolase fold protein       |
| SAZ_0379 | H289P        |               | [C] | oxidoreductase                          |
| SAZ_0496 | T258P        |               | [S] | AF110772_1 unknown                      |
| SAZ_0569 | H275P        |               | [M] | GouI                                    |
| SAZ_0612 | H214P        |               |     | hypothetical protein                    |
| SAZ_0692 | R316H        |               | [R] | ABC transporter                         |
| SAZ_0870 |              | S15R          | [C] | FAD-binding monooxygenase protein       |
| SAZ_0877 |              | Q272P         | [K] | MerR family transcriptional regulator   |
| SAZ_0972 | T13P         |               | [C] | flavoheмоprotein                        |
| SAZ_1010 |              | G590D         | [G] | glycoside hydrolase 15-like protein     |
| SAZ_1011 | V529G        | V621I         | [P] | potassium-transporting ATPase subunit B |

|          |       |        |     |                                                      |
|----------|-------|--------|-----|------------------------------------------------------|
| SAZ_1016 | T307P |        |     | amino acid transporter                               |
| SAZ_1062 |       | T527P  | [P] | Mn <sup>2+</sup> or Fe <sup>2+</sup> transporter     |
| SAZ_1118 |       | V1147G | [Q] | putative NRPS-type-I PKS fusion protein              |
| SAZ_1165 |       | T180P  | [M] | hypothetical protein                                 |
| SAZ_1195 | N8T   |        | [S] | hypothetical protein                                 |
| SAZ_1227 |       | T57P   |     | hypothetical protein                                 |
| SAZ_1229 |       | N357H  | [C] | citrate synthase                                     |
| SAZ_1284 |       | V116G  |     | hypothetical protein                                 |
| SAZ_1389 |       | F331C  | [K] | hypothetical protein                                 |
| SAZ_1419 | T385P |        | [T] | two-component sensor kinase                          |
| SAZ_1473 |       | T117P  | [S] | putative surface layer protein                       |
| SAZ_1530 |       | T357P  | [T] | magnesium or manganese-dependent protein phosphatase |
| SAZ_1564 | P103S |        | [F] | hypothetical protein                                 |
| SAZ_1614 | T103P |        | [E] | cholesterol oxidase                                  |
| SAZ_1645 |       | V37G   |     | hypothetical protein                                 |
| SAZ_1669 | A164P |        |     | hypothetical protein                                 |
| SAZ_1718 |       | T134P  | [K] | acetyltransferase                                    |
| SAZ_1760 |       | V297G  | [M] | glycosyl transferase family protein                  |

|          |                        |         |     |                                                                                |
|----------|------------------------|---------|-----|--------------------------------------------------------------------------------|
| SAZ_1831 |                        | T1140fs | [T] | hypothetical protein                                                           |
| SAZ_1881 | H207P                  |         | [K] | TetR-family transcriptional regulator                                          |
| SAZ_1981 |                        | V85G    | [I] | acyl-CoA dehydrogenase                                                         |
| SAZ_2021 | A181G                  |         | [K] | LysR family transcriptional regulator                                          |
| SAZ_2192 | A106G                  |         | [F] | guanylate kinase                                                               |
| SAZ_2193 | T7N                    |         |     | hypothetical protein                                                           |
| SAZ_2269 |                        | R71fs   |     | nicotinate-nucleotide-dimethylbenzimidazole phosphoribosyltransferase, partial |
| SAZ_2281 |                        | T445P   | [G] | major facilitator superfamily                                                  |
| SAZ_2395 |                        | T542P   | [G] | ABC transporter                                                                |
| SAZ_2443 |                        | V33G    | [L] | CRISPR-associated protein                                                      |
| SAZ_2574 | V258G                  |         | [G] | HAD-superfamily hydrolase, subfamily IIA                                       |
| SAZ_2595 |                        | L53P    | [K] | two-component system response regulator                                        |
| SAZ_2597 | S8P                    |         |     | aminoglycoside 2'-N-acetyltransferase                                          |
| SAZ_2625 | A756P, T753P,<br>H749P |         | [C] | acyl-CoA synthetase                                                            |
| SAZ_2647 | T352P                  |         |     | hypothetical protein SU9_05461, partial                                        |
| SAZ_2816 |                        | T97P    | [C] | aldehyde dehydrogenase                                                         |
| SAZ_2908 | A42P                   |         | [R] | hypothetical protein                                                           |

|          |       |                |     |                                                               |
|----------|-------|----------------|-----|---------------------------------------------------------------|
| SAZ_2922 | A7P   |                | [E] | branched-chain amino acid ABC transporter ATP-binding protein |
| SAZ_2928 |       | S89R           | [S] | hypothetical protein                                          |
| SAZ_2929 | V26F  |                | [F] | 5'-nucleotidase                                               |
| SAZ_3031 | A99G  |                |     | hypothetical protein                                          |
| SAZ_3141 |       | F119C,<br>T13P | [R] | hypothetical protein                                          |
| SAZ_3160 | A6P   | V303G          | [R] | amidohydrolase                                                |
| SAZ_3190 |       | L345R          | [G] | major facilitator superfamily protein                         |
| SAZ_3299 | T680P |                | [G] | multidrug-efflux transporter                                  |
| SAZ_3304 |       | V488G          |     | hypothetical protein                                          |
| SAZ_3318 | H42P  |                |     | hypothetical protein                                          |
| SAZ_3328 |       | H202P          | [T] | stress protein                                                |
| SAZ_3363 | V213G |                | [G] | ribose ABC transporter substrate-binding protein              |
| SAZ_3378 | T874P | T663P          |     | hypothetical protein                                          |
| SAZ_3413 |       | T180P          |     | hypothetical protein                                          |
| SAZ_3418 | V174G |                | [R] | metallopeptidase                                              |
| SAZ_3494 | T67fs |                | [K] | heat-inducible transcription repressor                        |
| SAZ_3587 |       | E19A           |     | hypothetical protein                                          |

|          |                  |        |     |                                            |
|----------|------------------|--------|-----|--------------------------------------------|
| SAZ_3618 | A147G            |        | [R] | ATP-binding membrane protein, partial      |
| SAZ_3850 |                  | L333V  | [G] | ABC transporter permease, partial          |
| SAZ_3853 |                  | N45T   |     | hypothetical protein                       |
| SAZ_3863 | W363G            |        | [R] | hydrolase                                  |
| SAZ_3874 |                  | P1341T | [E] | NAD-glutamate dehydrogenase                |
| SAZ_3986 | P87T, P90T, P90Q |        | [V] | ABC transporter ATP-binding protein        |
| SAZ_4016 | W112R            | V69I   |     | hypothetical protein                       |
| SAZ_4102 |                  | T623A  | [R] | penicillin acylase                         |
| SAZ_4103 |                  | T420P  | [P] | potassium/proton antiporter                |
| SAZ_4111 |                  | V364G  | [G] | major facilitator superfamily protein      |
| SAZ_4132 | A132V            |        | [K] | RNA polymerase principal sigma factor hrdd |
| SAZ_4218 |                  | W144G  | [K] | ECF subfamily RNA polymerase sigma factor  |
| SAZ_4270 | M1R              |        | [K] | DNA-directed RNA polymerase subunit alpha  |
| SAZ_4432 |                  | T21P   | [H] | delta-aminolevulinic acid dehydratase      |
| SAZ_4528 |                  | A882P  | [O] | ATP-dependent chaperone ClpB               |
| SAZ_4534 |                  | G205A  | [O] | heat shock protein GrpE                    |
| SAZ_4571 |                  | T578P  | [E] | amino acid permease-associated region      |
| SAZ_4578 | Y40D             |        | [L] | conserved hypothetical protein             |



|          |       |       |     |                                              |
|----------|-------|-------|-----|----------------------------------------------|
| SAZ_4715 |       | T238P | [M] | sortase                                      |
| SAZ_4718 | A63P  |       | [M] | hypothetical protein                         |
| SAZ_4911 | G188W |       | [G] | major facilitator superfamily permease       |
| SAZ_5014 | V294G |       | [V] | beta-lactamase                               |
| SAZ_5199 |       | E152K |     | hypothetical protein                         |
| SAZ_5290 | V144G |       | [J] | HemK family modification methylase           |
| SAZ_5477 | P501L | G73V  | [C] | FAD linked oxidase domain-containing protein |
| SAZ_5482 | V244M |       |     | hypothetical protein                         |
| SAZ_5548 |       | A18P  | [V] | hypothetical protein                         |
| SAZ_5549 |       | Y142S | [K] | hypothetical protein                         |
| SAZ_5643 |       | H296P |     | hypothetical protein                         |
| SAZ_5699 |       | R20P  |     | OHCU decarboxylase                           |
| SAZ_5716 |       | T429P | [C] | hypothetical protein                         |
| SAZ_5787 |       | Y89D  |     | hypothetical protein                         |
| SAZ_5788 |       | V1G   |     | RNA polymerase ECF-subfamily sigma factor    |
| SAZ_5826 | A188P |       |     | secreted protein                             |
| SAZ_6010 | V285G |       | [P] | KatA1                                        |
| SAZ_6013 | V35G  |       |     | TetR family transcriptional regulator        |

|          |              |        |     |                                                           |
|----------|--------------|--------|-----|-----------------------------------------------------------|
| SAZ_6022 |              | V399G  | [T] | hypothetical protein                                      |
| SAZ_6026 |              | Y13S   | [M] | putative penicillin-binding protein                       |
| SAZ_6066 |              | T41P   |     | peptidase M7 snapalysin                                   |
| SAZ_6141 | V948fs       |        | [Q] | beta-ketoacyl synthase                                    |
| SAZ_6166 |              | Y126S  | [L] | hypothetical protein (sigma-70 factor)                    |
| SAZ_6197 |              | T59P   | [K] | TetR-family transcriptional regulator                     |
| SAZ_6202 | T88fs,       |        | [G] | pyruvate kinase                                           |
| SAZ_6320 | T655P, T658P |        |     | lyase                                                     |
| SAZ_6414 |              | T211P  | [M] | M23 family peptidase                                      |
| SAZ_6435 |              | T183P  | [C] | aldehyde dehydrogenase                                    |
| SAZ_6481 | L270P        |        | [D] | hypothetical protein                                      |
| SAZ_6525 |              | A282P  | [V] | ABC-type drug export system, ATP-binding protein          |
| SAZ_6560 |              | T786P  | [Q] | amino acid adenylation domain-containing protein, partial |
| SAZ_6565 |              | L23P   | [Q] | hypothetical protein                                      |
| SAZ_6619 | A35P         |        | [R] | protease                                                  |
| SAZ_6624 | V210G        |        | [E] | LysE family efflux protein                                |
| SAZ_6654 |              | D241fs | [G] | glycogen debranching protein                              |
| SAZ_6691 |              | L78V   |     | hypothetical protein                                      |

|          |               |       |     |                                               |
|----------|---------------|-------|-----|-----------------------------------------------|
| SAZ_6695 | S328A, A329fs |       | [S] | ribonuclease BN                               |
| SAZ_6739 | W210X         |       | [K] | MerR family transcriptional regulator         |
| SAZ_6762 |               | L78R  | [R] | hypothetical protein                          |
| SAZ_6873 | R43C          |       | [R] | short-chain dehydrogenase/reductase SDR       |
| SAZ_6911 |               | L408F |     | agarase                                       |
| SAZ_6912 |               | A352T |     | hypothetical protein                          |
| SAZ_6927 | T189P         |       |     | hypothetical protein                          |
| SAZ_6952 | T63P          |       |     | hypothetical protein                          |
| SAZ_7056 | T158P         |       |     | hypothetical protein                          |
| SAZ_7134 |               | D314A | [R] | methyltransferase                             |
| SAZ_7162 | A29P          |       |     | hypothetical protein                          |
| SAZ_7219 | E506K         |       | [S] | SNF2/RAD54 family helicase                    |
| SAZ_7268 |               | I200L | [G] | AF164960_3 transporter                        |
| SAZ_7413 |               | T191P | [C] | fatty acid-CoA racemase                       |
| SAZ_7475 |               | V144G |     | hypothetical protein                          |
| SAZ_7509 | G10R          |       | [R] | amidohydrolase                                |
| SAZ_7687 | H430P         |       | [M] | cyclopropane-fatty-acyl-phospholipid synthase |
| SAZ_7711 | A11P          |       | [R] | putative sugar acetyltransferase              |

|          |              |        |     |                                                       |
|----------|--------------|--------|-----|-------------------------------------------------------|
| SAZ_7753 |              | H24P   | [E] | pyridoxal-5'-phosphate-dependent protein beta subunit |
| SAZ_7754 | A189P, H191P | R190P  | [G] | putative MFS transporter                              |
| SAZ_7807 | M1L, R4L     |        | [M] | apolipoprotein N-acyltransferase                      |
| SAZ_7833 | R149P        | A167P  | [K] | LacI family transcriptional regulator                 |
| SAZ_7840 | T43P         |        | [R] | hypothetical protein                                  |
| SAZ_8017 | A237E        |        | [L] | hypothetical protein                                  |
| SAZ_8129 |              | H185P  | [I] | acetyl-CoA acetyltransferase                          |
| SAZ_8131 | R365P        |        | [R] | enoyl-ACP reductase II                                |
| SAZ_8139 |              | T118P  | [E] | 4-hydroxy-2-oxovalerate aldolase                      |
| SAZ_8203 |              | H4P    |     | hypothetical protein                                  |
| SAZ_8204 |              | T431P  | [R] | von Willebrand factor type A                          |
| SAZ_8231 | T305P        |        |     | putative cytoplasmic protein                          |
| SAZ_8270 | V371G        |        |     | hypothetical protein                                  |
| SAZ_8294 |              | E463K  | [J] | amidase                                               |
| SAZ_8322 | R203M        |        | [E] | methionine synthase                                   |
| SAZ_8414 |              | V317G  |     | VanZ-like protein                                     |
| SAZ_8482 |              | E1987A | [G] | Rhs protein, partial                                  |
| SAZ_8527 |              | D230A  |     | membrane protein, PF10067 family                      |

|          |                 |  |     |                                      |
|----------|-----------------|--|-----|--------------------------------------|
| SAZ_8616 | T364P           |  | [I] | acyl-CoA dehydrogenase               |
| SAZ_8649 | T10P            |  | [M] | AF263912_4NysDIII                    |
| SAZ_8655 | 3676_3677del    |  | [Q] | AF263912_6NysJ                       |
| SAZ_8662 | A438P           |  | [Q] | AF263912_13NysA                      |
| SAZ_8738 | H481P, A17P     |  | [V] | beta-lactamase                       |
| SAZ_8741 | G397V           |  | [C] | radical SAM domain containing enzyme |
| SAZ_8790 | E1384delinsEVGM |  | [Q] | beta-ketoacyl synthase               |
| SAZ_8963 | S1769P, A1773P  |  | [Q] | type I polyketide synthase           |
